# Supplementary material for: Synthesis and study of donor–acceptor conjugated polymers based on the dithienopyrrolobenzothiadiazole unit via a metal free aldol condensation polymerization strategy and their SCLC hole mobilities
Source: Royal Society of Chemistry journal article supplement (doi:10.1039/d4nj03839h), 2024-01-01
Supplement: d4nj03839h1.pdf [file d4nj03839h1.pdf]

# Synthesis and Study of Donor-Acceptor Conjugated Polymers based on Dithienopyrrolobenzothiadiazole unit *via* Metal Free Aldol Condensation Polymerization Strategy and their SCLC Hole Mobilities

Prerak R. Patel,<sup>‡</sup> Mayur J. Patel,<sup>†</sup> Parameswar K. Iyer,<sup>†##</sup> Sanjio S. Zade<sup>‡\*</sup> and Arun L. Patel<sup>‡\*</sup>

<sup>‡</sup>*Department of Chemistry, Faculty of Science, The Maharaja Sayajirao University of Baroda, Vadodra-390002, Gujarat, India. E-mail: [arunpatel\\_5376@yahoo.co.in](mailto:arunpatel_5376@yahoo.co.in)*

<sup>†</sup>*Centre of Nanotechnology, Indian Institute of Technology Guwahati, Guwahati, Assam-781039, India.*

<sup>#</sup>*Department of Chemistry, Indian Institute of Technology Guwahati, Guwahati, Assam-781039, India. E-mail: [pki@iitg.ac.in](mailto:pki@iitg.ac.in)*

<sup>‡</sup>*Department of Chemical Sciences, Indian Institute of Science Education and Research (IISER) Kolkata, Mohanpur-741246, India. E-mail: [sanjiozade@iiserkol.ac.in](mailto:sanjiozade@iiserkol.ac.in)*

## CONTENTS

| Sr No | Contents                                             | Page No |
|-------|------------------------------------------------------|---------|
| 1     | Materials and Instrumentation                        | S2      |
| 2     | Synthesis of precursor compounds 1, 3, 5 and 7       | S2-S10  |
| 3     | Spectral data of intermediate compounds and monomers | S11-S30 |
| 4     | Spectral data and GPC analysis data of polymers      | S31-S35 |
| 5     | References                                           | S35     |

## Materials and Instrumentation

All the chemical were reagent grade and used as it was purchased. Moisture-sensitive reaction were carried out using dry solvents in an inert environment of dry nitrogen. Reaction were monitored by thin-layer chromatography (TLC) using Merck 60 F254 aluminum-coated plates. Synthesized compounds were purified by column chromatography using Silica gel (60-120 mesh and 100-200 mesh). NMR spectra were recorded on a Bruker Avance-III 400 spectrometer, NMR in  $\text{CDCl}_3$  and  $\text{DMSO-D}^6$ . High resolution mass spectra (HRMS) were recorded on Xevo G2-XS QTOF Mass Spectrometer.

### Synthesis of precursor compounds 1, 3, 5 and 7

#### Synthesis of 1,1'-bis(2-ethylhexyl)-[5,5'-biindoline]-2,2',3,3'-tetraone (1)

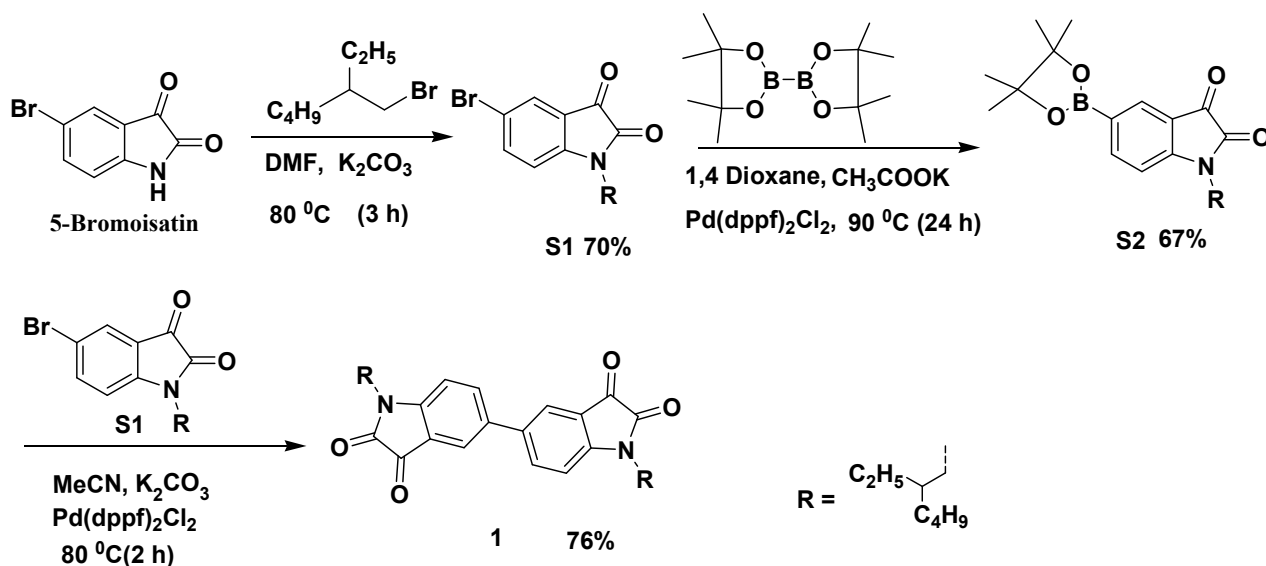

#### Scheme S1 Synthesis of compound 1 from 5-bromoisatin

Compound 1 was synthesized according to the modified literature procedure (Scheme 1).<sup>1,2</sup>

#### Synthesis of 5-bromo-1-(2-ethylhexyl)indoline-2,3-dione (S1)

Under nitrogen atmosphere, 5-bromoisatin (2.0 g, 8.84 mmol) and anhydrous potassium carbonate (5.492 g, 39.8 mmol) were dissolved in dry DMF (18 mL) and heated for 10 minutes at 50 °C. After adding ethylhexyl bromide (2.73 mL; 15.4 mmol), the reaction mixture was stirred at 80 °C for 4 hours. The reaction mixture was poured into 180 mL of  $\text{H}_2\text{O}$  and then extracted with ethyl acetate. The organic fraction was washed with brine and water and dried over anhydrous  $\text{Na}_2\text{SO}_4$ . A crude product was obtained as a dark crimson oil, which was further purified by column chromatography using 5% ethyl acetate in petroleum ether.

Compound **S1**: Orange red solid (2.45g, 70%). <sup>1</sup>H NMR (400 MHz, CDCl<sub>3</sub>): δ 7.690-7.713 (dd, J<sub>1</sub>= 7.2 Hz, J<sub>2</sub>= 2 Hz, 2H), 6.796-6.818 (dd, 1H, J<sub>1</sub> = 8 Hz, J<sub>2</sub> = 1.6 Hz), 3.556-3.624 (t, 2H), 1.722-1.806 (s, 1H), 1.281-1.430 (m, 8H), 0.898-0.958 (m, 6H). IR (KBr, cm<sup>-1</sup>): 2959, 2927, 2864, 1732, 1605, 1471, 1467, 1438, 1326, 1182, 825, 711, 468.

Synthesis of 1-(2-ethylhexyl)-5-(4,4,5,5-tetramethyl-1,3,2-dioxaborolan-2-yl)indoline-2,3-dione (**S2**)

In a dry two-neck round bottom flask, a mixture of 1,4 dioxane (20 mL), compound **S1** (1.0 g, 2.9 mmol), bis(pinacolato)diborane (1.12 g, 4.4 mmol), and potassium acetate (0.580 g, 5.9 mmol) was taken. After degassing for 30 minutes with sparging nitrogen, catalyst, Pd(PPh<sub>3</sub>)<sub>2</sub>Cl<sub>2</sub> (0.103 g, 0.14mmol) was added and the reaction mixture was heated at 100 °C for 24 hours under a nitrogen atmosphere. The reaction mixture was then poured into 200 mL of H<sub>2</sub>O and the organic layer was extracted with ethyl acetate. The organic layer was washed with H<sub>2</sub>O and brine, dried over anhydrous Na<sub>2</sub>SO<sub>4</sub> and concentrated to obtain red oil as the crude product. The crude product was further purified by column chromatography using 20% ethyl acetate in petroleum ether to get red oil.

Compound **S2**: Orange red liquid (0.81g, 67%). <sup>1</sup>H NMR (400 MHz, CDCl<sub>3</sub>): δ 8.056-8.058 (d, J = 0.8 Hz, 1H ), 8.007-8.030 (dd, J<sub>1</sub> = 8 Hz, J<sub>2</sub> = 1.2 Hz, 1H), 6.866-6.886 (d, J = 8 Hz, 1H), 3.610-3.638 (m, 2H), 1.777 (s, 1H), 1.347 (s, 12H), 1.273-1.327 (m, 8H) 0.874-0.954 (m, 6H). <sup>13</sup>C NMR (100 MHz, CDCl<sub>3</sub>): δ 183.34, 158.71, 153.53, 145.05, 131.88, 117.10, 109.73, 84.27, 44.40, 37.33, 30.52, 28.56, 25.02, 23.89, 22.99, 14.06, 10.55.

Synthesis of 1,1'-bis(2-ethylhexyl)-[5,5'-biindoline]-2,2',3,3'-tetraone (**1**)

Compound **S2** (0.860 g, 2.5 mmol) and compound **S1** (1.10 g, 2.88mmol) were dissolved in 45 mL acetonitrile and the reaction mixture was stirred for 5 minutes. 2 M K<sub>2</sub>CO<sub>3</sub> (0.84 g, 6.1 mmol) solution was added to the reaction mixture, followed by 30 minutes of nitrogen purging. The catalyst, Pd(dppf)<sub>2</sub>Cl<sub>2</sub> (0.10 g, 0.147 mmol) was added and the reaction mixture was heated at reflux temperature for 6 hours. After the completion of the reaction, 200 mL of water was added and the product was extracted with ethyl acetate. The organic layers are washed with saturated brine solution, then with water, and finally dried by adding anhydrous Na<sub>2</sub>SO<sub>4</sub>. After solvent evaporation, the crude product is further purified by column chromatography over silica gel using 30% ethyl acetate in petroleum ether as an eluent.

Compound **1**: Brown red solid (1.0 g, 76%). <sup>1</sup>H NMR (400 MHz, CDCl<sub>3</sub>): δ 7.750-7.783 (m, 4H), 6.990-7.010 (d, J<sub>1</sub>= 8 Hz, 2H), 3.652-3.682 (m, 4H), 1.844-1.873 (m, 2H), 1.264-1.456 (m, 16H), 0.916-0.989 (m, 12H). <sup>13</sup>C NMR (100MHz, CDCl<sub>3</sub>): 183.43, 158.43, 150.89, 136.10, 134.89, 123.17, 118.16, 111.05, 44.59, 37.44, 30.61, 28.81, 28.66, 24.83, 23.87, 23.00, 14.02, 10.55. HRMS(ES<sup>+</sup>): C<sub>32</sub>H<sub>41</sub>N<sub>2</sub>O<sub>4</sub> requires 517.3066, found 517.3075.

### Synthesis of 5,5'-([2,2'-bithiophene]-5,5'-diyl)bis(1-(2-ethylhexyl)indoline-2,3-dione) (**3**)

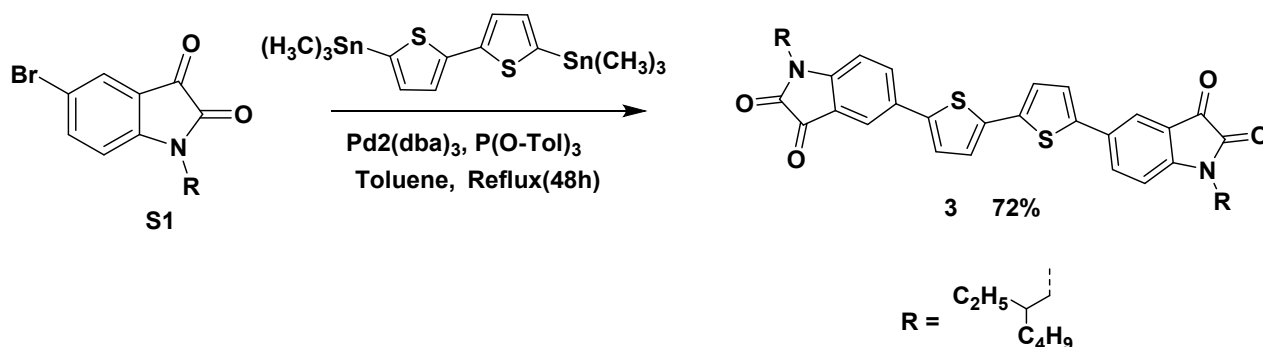

### Scheme S2 Synthesis of compound **3** from compound **S1**

Compound **3** was synthesized according to the modified literature procedure.<sup>3</sup>

A mixture of compound **S1** (0.604 g, 1.79 mmol), 5,5'-bis(trimethylstannyl)-2,2'-bithiophene (0.400 g, 0.814 mmol), Pd<sub>2</sub>(dba)<sub>3</sub> (0.074 g, 0.081 mmol) and P(o-tol)<sub>3</sub> (0.318 g, 0.651 mmol) were taken 30 mL toluene in two-neck round bottom flask under nitrogen atmosphere. The mixture was stirred for 24 hours at 110 °C. After completion of the reaction, the reaction mixture was cooled down to room temperature and poured it in water followed by extraction with dichloromethane. The organic extract was washed with water and then dried with anhydrous Na<sub>2</sub>SO<sub>4</sub>. The crude product obtained after removal of the solvent under reduced pressure was further purified by silica gel chromatography using 40% DCM in petroleum ether as an eluent.

Compound **3**: Brown solid (0.600 g, 72.2%). <sup>1</sup>H NMR (400 MHz, CDCl<sub>3</sub>): δ 7.800-7.840 (m, 4H), 7.180-7.221 (dd, J<sub>1</sub>= 12.8 Hz, J<sub>2</sub>= 3.6 Hz, 4H), 6.926-6.946 (d, J<sub>1</sub>= 8 Hz, 2H), 3.638-3.684 (m, 4H), 1.832-1.847 (m, 2H), 1.266-1.453 (m, 16H), 0.908-0.988 (m, 12H). <sup>13</sup>C NMR (100 MHz, CDCl<sub>3</sub>): 183.45, 158.39, 150.34, 141.06, 136.70, 134.90, 130.04, 124.92, 124.13, 122.17, 118.05, 110.90, 44.58, 37.49, 30.64, 28.64, 24.00, 23.01, 14.04, 10.57. HRMS (ES<sup>+</sup>): C<sub>40</sub>H<sub>45</sub>N<sub>2</sub>O<sub>4</sub>S<sub>2</sub> requires 681.2821, found 681.2816. IR (KBr, cm<sup>-1</sup>): 3438, 2957, 2928, 2862, 1730, 1617, 1588, 1529, 1482, 1436, 1353, 1331, 1280, 1187, 1116, 1033, 832, 789, 715, 465.

### Synthesis of 2,7-dibromo-9-(2-ethylhexyl)-9H-carbazole (S5)

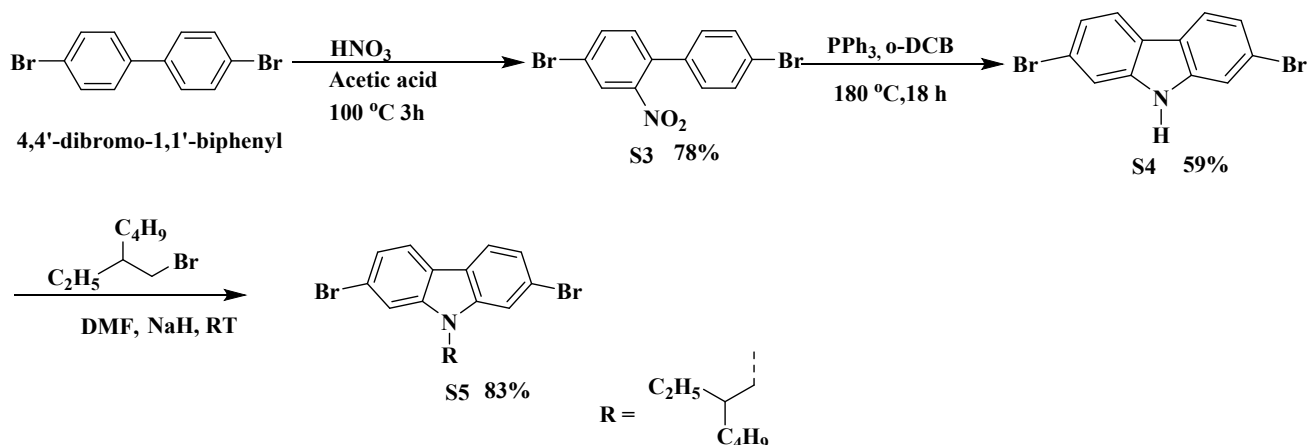

**Scheme S3** Synthesis of compound **S5** from 4,4'-dibromo-1,1'-biphenyl.

### Synthesis of 4,4'-dibromo-2-nitro-1,1'-biphenyl (S3)

Compound **S3** was synthesized according to the modified literature procedure.<sup>4-6</sup>

In a 250 mL, two-neck round bottom flask, 4,4'-dibromo-biphenyl (4 g, 12.82 mmol) in glacial AcOH (60 mL) was taken and heated at 100 °C. To this solution fuming HNO<sub>3</sub> (100%, 18.5 mL) and H<sub>2</sub>O (1.5 mL) was added. The reaction mixture was stirred at 100 °C for 30 minutes and then allowed to cool to room temperature. The resultant reaction mixture was poured in to water and subsequently extracted with DCM. The organic layer was then washed successively with water and dried over anhydrous Na<sub>2</sub>SO<sub>4</sub>. The compound **S3** was obtained by evaporation of solvent under reduced pressure.

Compound **S3**: Yellow solid (3.60 g, 78%). <sup>1</sup>H NMR (400 MHz, CDCl<sub>3</sub>): δ 8.086 (s, 1H), 7.88-7.90 (d, J = 8.4, 2H), 7.587-7.591 (d, J = 1.6 Hz, 2H), 7.367-7.391 (dd, J<sub>1</sub> = 8 Hz, J<sub>2</sub> = 1.6 Hz, 2H).

### Synthesis of 2,7-dibromocarbazole (S4)

Compound **S3** (6 g, 16.8 mmol) and PPh<sub>3</sub> (11 g, 42.0 mmol) were dissolved in *o*-dichlorobenzene (35 mL) under nitrogen atmosphere and refluxed for 24 hours. After the completion of reaction, the solvent was evaporated and the crude product was purified by column chromatography over silica gel by using 20% ethyl acetate in petroleum ether.

Compound **S4**: White solid (3.25 g, 59%). <sup>1</sup>H NMR (400 MHz, CDCl<sub>3</sub>): δ 8.053-8.058 (d, J = 2 Hz, 1H), 7.770-7.796 (dd, J = 8.4 Hz, J = 2 Hz, 1H), 7.598 (s, 1H), 7.577-7.582 (d, J = 2 Hz, 1H), 7.305-7.326 (d, J = 8.4 Hz, 1H), 7.171-7.192 (dd, J = 1.6 Hz, J = 6.4 Hz, 2H).

### Synthesis of 2,7-dibromo-9-(2-ethylhexyl)-9*H*-carbazole (**S5**)

In a 100 mL, two-neck round bottom flask, compound **S4** (5 g, 15.4 mmol) in DMF (50 mL) was taken. To this reaction mixture, NaH (60% w/w suspension in mineral oil) (865 mg, 21.6 mmol) was added. After 1 hour, 2-ethylhexyl bromide (3.83 g, 19.84 mmol) was added and the reaction mixture was stirred at room temperature for further 20 hours under nitrogen atmosphere. After the completion of the reaction, the reaction mixture was poured in water and the product was extracted in ethyl acetate. Organic fraction was washed with brine and dried over anhydrous Na<sub>2</sub>SO<sub>4</sub>, followed by solvent distillation under reduced pressure. The resultant crude product was subjected to the column chromatography over silica gel by using 5% ethyl acetate in petroleum ether to get desired pure product.

Compound **S5**: White solid (7.0 g, 83%). <sup>1</sup>H NMR (400 MHz, CDCl<sub>3</sub>): δ 7.895-7.916 (d, J = 8.4 Hz, 2H), 7.520 (s, 2H), 7.344-7.368 (dd, J<sub>1</sub> = 8.2 Hz, J<sub>2</sub> = 1.2 Hz, 2H), 4.061-4.076 (d, J = 6 Hz, 2H), 1.995-2.097 (m, 1H), 1.239–1.406 (m, 24H), 0.864–0.912 (m, 6H).

### Synthesis of 5,5'-(9-(2-ethylhexyl)-9*H*-carbazole-2,7-diyl)bis(1-(2-ethylhexyl)indoline-2,3-dione) (**5**)

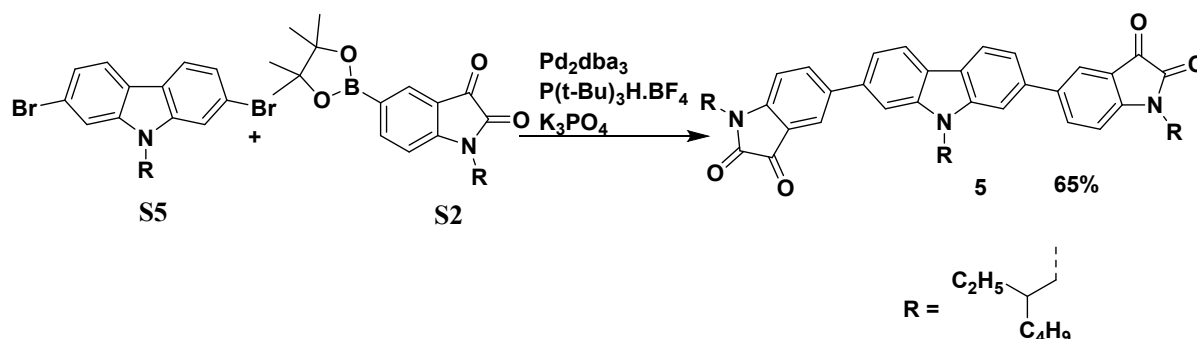

### Scheme S4 Synthesis of compound **5** from compound **S5**

Compound **S5** was synthesized according to the modified literature procedure.<sup>7</sup>

Compound **S5** (0.500 g, 1.14 mmol), compound **S2** (0.951 g, 2.47 mmol) and Pd<sub>2</sub>(dba)<sub>3</sub> (47 mg, 0.052 mmol), P(t-Bu)<sub>3</sub>·HBF<sub>4</sub> (62 mg, 0.216 mmol) were taken into clean and dry two-neck round bottom flask under nitrogen atmosphere. THF (40 mL) and potassium phosphate (1.7 g, 2M) were added into the reaction mixture and the resultant mixture was stirred at 80 °C for 24 hours. After completion of reaction, the cold solution of the reaction mixture was poured into

water and the product was extracted with dichloromethane, dried over anhydrous Na<sub>2</sub>SO<sub>4</sub>, and purified by silica gel column chromatography using 50% ethyl acetate in petroleum ether.

Compound **5**: Dark red solid (0.60 g, 65%). <sup>1</sup>H NMR (400 MHz, CDCl<sub>3</sub>): δ 8.163-8.183 (d, J = 8 Hz, 2H), 7.938-7.974 (m, 4H), 7.515 (s, 2H), 7.420-7.443 (dd, J = 8 Hz, J = 1.2 Hz, 2H), 7.014-7.034 (d, J = 8.0 Hz, 2H), 4.253-4.287 (m, 2H), 3.667-3.696 (m, 4H), 2.086 (s, 1H), 1.878– 1.893 (d, 2H), 1.270-1.464 (m, 32H), 0.879-1.009 (m, 22H). <sup>13</sup>C NMR (100 MHz, CDCl<sub>3</sub>): δ 183.83, 158.64, 150.36, 142.05, 138.08, 137.08, 137.04, 124.11, 122.15, 120.96, 118.19, 188.11, 110.79, 106.99, 47.57, 44.53, 39.38, 37.49, 30.96, 30.62, 28.66, 24.86, 24.02, 23.02, 14.05, 11.03, 10.60. HRMS (ES<sup>+</sup>): C<sub>52</sub>H<sub>64</sub>N<sub>3</sub>O<sub>4</sub> requires 794.4897, found 794.4905. IR (KBr, cm<sup>-1</sup>): 3455, 3055, 2958, 2927, 2865, 1736, 1617, 1501, 1459, 1332, 1332, 1254, 1186, 1118.

### Synthesis of 10,11-bis(2-ethylhexyl)-10,11-dihydro-[1,2,5]thiadiazolo[3,4-*e*]thieno[2',3':4,5]pyrrolo[3,2-*g*]thieno[3,2-*b*]indole-2,8-dicarbaldehyde from 1,2-phenylenediamine (**7**)

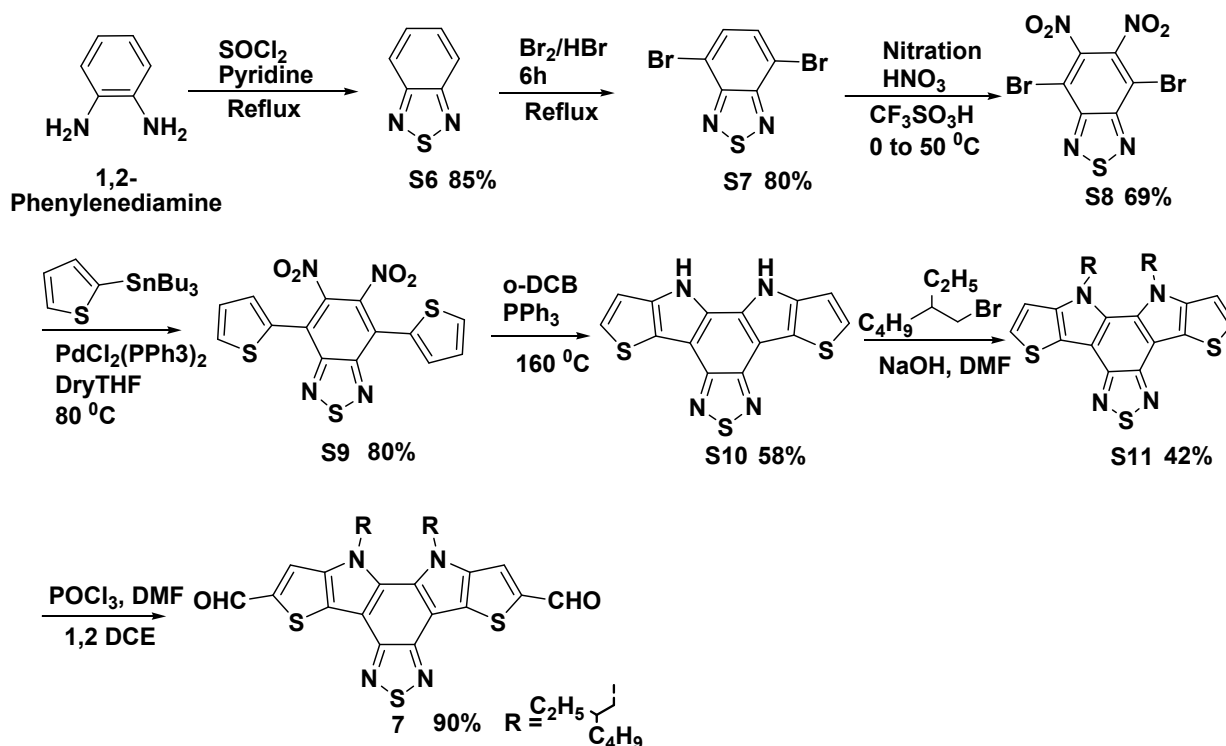

Scheme S5 Synthesis of compound **7**

Compound **7** was synthesized according to the modified literature procedure.<sup>8</sup>

### Synthesis of 2,1,3-benzothiadiazole (**S6**)

In a three-neck, 500 mL round bottom flask, 1,2-phenylenediamine (5.0 g, 46.2 mmol), 150 mL of dichloromethane and triethylamine (19 g, 185 mmol) was added. The reaction mixture was stirred until total dissolution of the 1,2-phenylenediamine. To this stirred reaction mixture, a solution of SOCl<sub>2</sub> in a small amount of dichloromethane was added slowly and the resulting reaction mixture was refluxed for 4 hours. The solvent was removed in a rotary evaporator and resulting concentrate was diluted with 400 mL of water. The pH of the solution was adjusted to 2 by adding concentrated HCl. The crude product was purified by steam distillation. The steam distilled compound was extracted with 120 mL of dichloromethane, dried over anhydrous Na<sub>2</sub>SO<sub>4</sub>. The solvent was removed to get pure compound **S6**.

Compound **S6**: White solid (2.8 g, 45%); <sup>1</sup>H NMR (400 MHz, CDCl<sub>3</sub>): 8.00–8.05 (dd, J<sub>1</sub> = 6.8 Hz, J<sub>2</sub> = 3.2 Hz, 1H), 7.59–7.63 (dd, J<sub>1</sub> = 6.8 Hz, J<sub>2</sub> = 3.2 Hz, 1H). ESI-Mass 135.90 [M<sup>+</sup>] (100.0%), 135.17 [M–1(-H)] (42.4%).

### Synthesis of 4,7-dibromo-2,1,3-benzothiadiazole (**S7**)

In a 500 mL two-neck round bottom flask, compound **S6** (5.00 g, 37 mmol) and 75 mL of HBr (47%) were added and a reaction mixture was allowed to stir at 60 °C for 20 minutes. A solution of Br<sub>2</sub> (17.60 g, 110.16 mmol) in 50 mL of hydrobromic acid was added dropwise into the reaction mixture. After addition of the Br<sub>2</sub>, the reaction mixture was refluxed for 6 hours. The reaction mixture was allowed to cool to room temperature and unreacted Br<sub>2</sub> was removed by addition of saturated solution of NaHSO<sub>3</sub>. The crude product was filtered and washed with water and purified by silica gel column chromatography using 10% ethyl acetate in petroleum ether.

Compound **S7**: White solid (20.3 g, 94%); <sup>1</sup>H NMR (400 MHz, CDCl<sub>3</sub>): 7.75 (s, 1H).

### Synthesis of 4,7-dibromo-5,6-dinitro-2,1,3-benzothiadiazole (**S8**)

In a two-neck, 250 mL round bottom flask, fuming nitric acid (3.0 g; 47.6 mmol) was taken and chilled in an ice- salt bath under nitrogen atmosphere. Trifluoromethanesulfonic acid (30 g; 200 mmol) was added into this mixture and stirred it for 30 minutes. To this solution, compound **S7** (5.0 g; 17.0 mmol) was added in portion-wise over a period of 30 minutes to avoid exothermicity. The reaction mixture was further stirred at 50 °C for 8 hours, during which evolution of brisk red coloured gas was noted. After completion of the reaction, the reaction mixture was poured into ice water slowly, and then NaOH solution was added to neutralize the



excess acid. The resulting solution was filtered and rinsed with water. The pure product was obtained by recrystallization of crude product from ethanol.

Compound **S8**: Yellow beige solid (2.71 g, 83%); <sup>1</sup>H NMR (400 MHz, CDCl<sub>3</sub>): No proton signals observed. <sup>13</sup>C NMR (100 MHz, CDCl<sub>3</sub>): 151.3, 144.9, 110.3.

#### Synthesis of 5,6-dinitro-4,7-di(thiophene-2-yl)-2,1,3-benzothiadiazole (**S9**)

In a two-neck round bottom flask, compound **S8** (1.9 g; 4.95 mmol), PdCl<sub>2</sub>(PPh<sub>3</sub>)<sub>2</sub> (0.07 g; 0.1 mmol) and 20 mL of dried THF were degassed by purging nitrogen gas through the reaction mixture for 15 minutes. To the degassed reaction mixture, tri-*n*-butyl(thiophen-2-yl)stannane (4.25 g; 11.4 mmol) was added and the mixture was refluxed for 8 hours. After the reaction was completed, the reaction mixture was poured into water and the organic layer was extracted in DCM before being dried over anhydrous Na<sub>2</sub>SO<sub>4</sub>. The pure product was obtained by column chromatography over silica gel by using 20% ethyl acetate in petroleum ether as an eluent.

Compound **S9**: Orange red solid (1.54 g, 79%); <sup>1</sup>H NMR (400 MHz, CDCl<sub>3</sub>): 7.76–7.77 (dd, J<sub>1</sub> = 4.8 Hz, J<sub>2</sub> = 1.2 Hz, 1H), 7.53–7.54 (dd, J<sub>1</sub> = 4.0 Hz, J<sub>2</sub> = 1.2 Hz, 1H), 7.25–7.27 (m, 1H).

#### Synthesis of 10,11-dihydro-[1,2,5]thiadiazolo[3,4-*e*]thieno[2',3':4,5]pyrrolo[3,2-*g*]thieno[3,2-*b*]indole (**S10**)

In a two-neck, 250 mL round bottom flask was charged with compound **S9** (1.0 g; 2.5 mmol), PPh<sub>3</sub> (6.55 g; 25 mmol) and 125 mL of 1,2-dichlorobenzene (*o*-DCB) under nitrogen atmosphere. The reaction mixture was degassed by purging nitrogen gas through the reaction mixture for 10 minutes. The reaction mixture was heated to 160 °C under nitrogen atmosphere for 24 hours. After completion of a reaction, the cold reaction mixture was poured into water and extracted in ethyl acetate. The compound was purified by column chromatography using 40% ethyl acetate in petroleum ether to get a bright yellow solid.

Compound **S10**: Bright yellow solid (0.65 g, 77%); <sup>1</sup>H NMR (400 MHz, DMSO-*d*<sub>6</sub>): 11.922 (s, 2H), 7.606–7.620 (d, J = 5.6 Hz, 1H), 7.424–7.437 (d, J = 5.2 Hz, 1H).

#### Synthesis of 10,11-bis(2-ethylhexyl)-10,11-dihydro-[1,2,5]thiadiazolo[3,4-*e*]thieno[2',3':4,5]pyrrolo[3,2-*g*]thieno[3,2-*b*]indole (**S11**)

In a 100 mL round bottom flask, compound **S10** (0.84 g; 2.5 mmol) was dissolved in anhydrous DMSO (90 mL). To this stirred solution KOH powder (1.73 g; 30.0 mmol) and ethyl hexyl bromide (3.0 mL; 16.25 mmol) was added and the resulting mixture was allowed to stir under

nitrogen atmosphere at 80 °C for 12 hours. After the completion of reaction, the reaction mixture was poured into water and organic layer was extracted in DCM before being dried over anhydrous Na<sub>2</sub>SO<sub>4</sub>. The pure product was obtained by column chromatography over silica gel by using 5% ethyl acetate in petroleum ether as an eluent.

Compound **S11**: Yellowish orange liquid (1.01 g, 71%); <sup>1</sup>H NMR (400 MHz, CDCl<sub>3</sub>): 7.442–7.455 (d, J = 5.2 Hz, 2H), 7.182–7.195 (d, J = 5.2 Hz, 1H), 4.502–4.531 (m, 4H), 1.969–2.00 (m, 2H), 0.861–1.071 (m, 20H), 0.627–0.660 (m, 12H). <sup>13</sup>C NMR (100 MHz, CDCl<sub>3</sub>): 147.64, 145.15, 132.63, 126.47, 120.98, 112.10, 110.57, 54.15, 39.28, 29.73, 29.58, 27.74, 23.05, 22.71, 13.78, 10.07, 10.04.

Synthesis of 10,11-bis(2-ethylhexyl)-10,11-dihydro-[1,2,5]thiadiazolo[3,4-*e*]thieno[2',3':4,5]pyrrolo[3,2-*g*]thieno[3,2-*b*]indole-2,8-dicarbaldehyde (**7**)

In a clean dry, two-neck round-bottom flask, DMF (4.21 mL, 54.3mmol) was taken and stirred it in an ice-salt bath. To this solution, POCl<sub>3</sub> (4.22 mL, 45.2 mmol) was added and stirred for an hour at 0 °C. In the resulting reaction mixture, the solution of compound **S11** (1.0 g, 1.81 mmol) in DCE (37 mL) was added dropwise with the help of a syringe through a rubber septum. The reaction mixture was stirred at room temperature for an hour and refluxed for 24 hours. After the completion of the reaction, DCE was evaporated and the crude product was washed with water and then extracted with DCM. The organic layer was then dried over anhydrous Na<sub>2</sub>SO<sub>4</sub> and the DCM was evaporated to get pure solid compound.

Compound **7**: Dark yellow solid (0.90 g, 81%); <sup>1</sup>H NMR (400 MHz, CDCl<sub>3</sub>): 10.046 (s, 2H), 7.861 (s, 2H), 4.555–4.581 (m, 4H), 1.994 (s, 2H), 0.993–1.267 (m, 18H), 0.907–0.981 (m, 12H). <sup>13</sup>C NMR (100 MHz, CDCl<sub>3</sub>): 183.17, 147.49, 144.77, 144.52, 134.58, 128.29, 119.82, 112.19, 54.44, 39.65, 29.60, 27.71, 23.09, 22.70, 13.75, 10.04, 10.03. HRMS (ES<sup>+</sup>): C<sub>32</sub>H<sub>39</sub>N<sub>2</sub>O<sub>2</sub>S<sub>3</sub> requires 606.2157, found 607.2217. IR (KBr, cm<sup>-1</sup>): 3077, 2957, 2926, 2857, 1650, 1508, 1457, 1419, 1355, 1294, 1224, 1189, 1130, 1076, 863, 812, 704, 643, 503.

## Spectral data of intermediate compounds and monomers

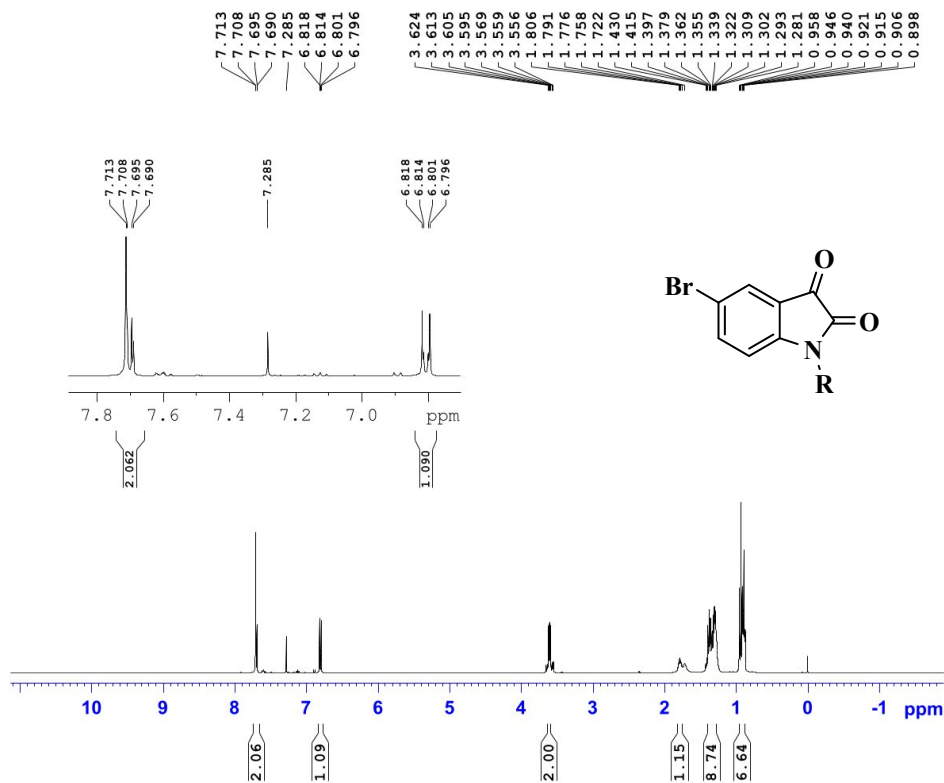

Figure S1: <sup>1</sup>H NMR spectra of compound S1

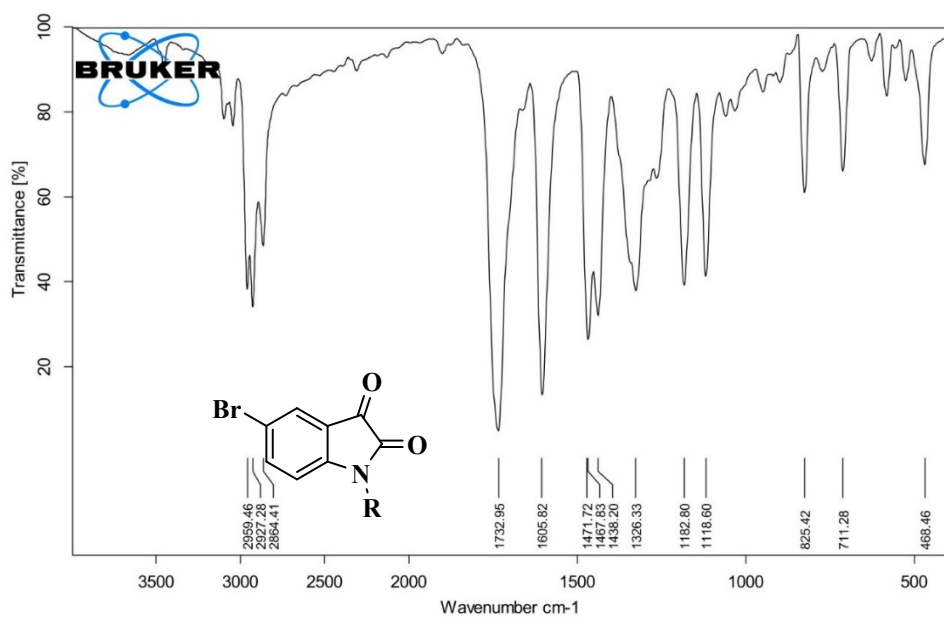

Figure S2: IR spectrum (KBr pellet) of compound S1

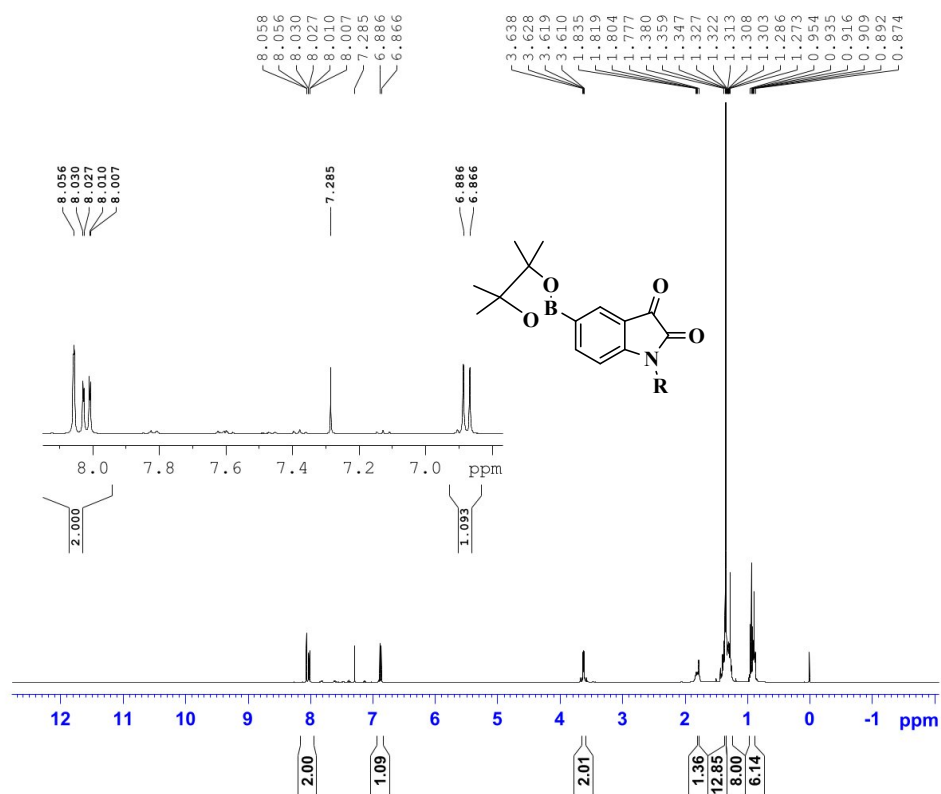

Figure S3: <sup>1</sup>H NMR spectra of compound S2

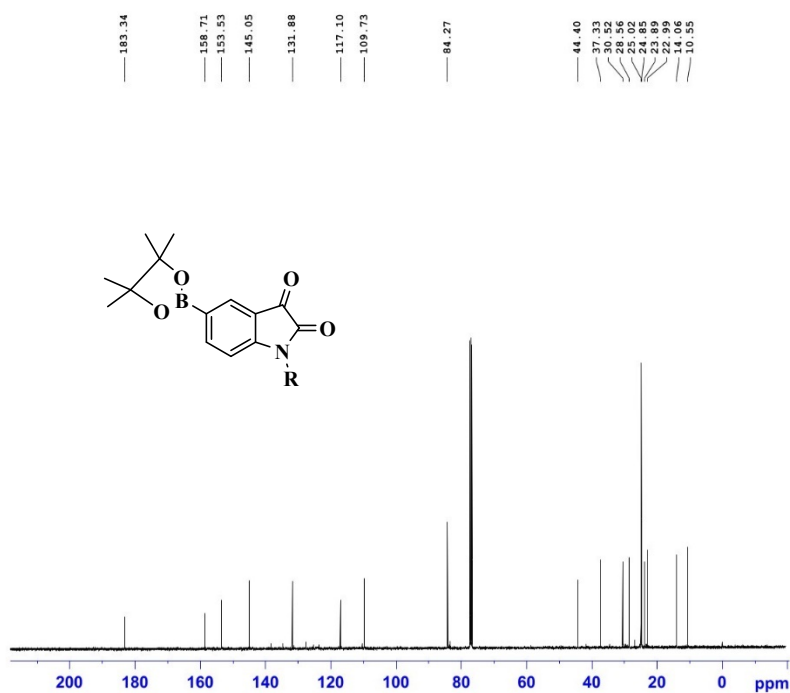

Figure S4: <sup>13</sup>C NMR spectra of compound S2

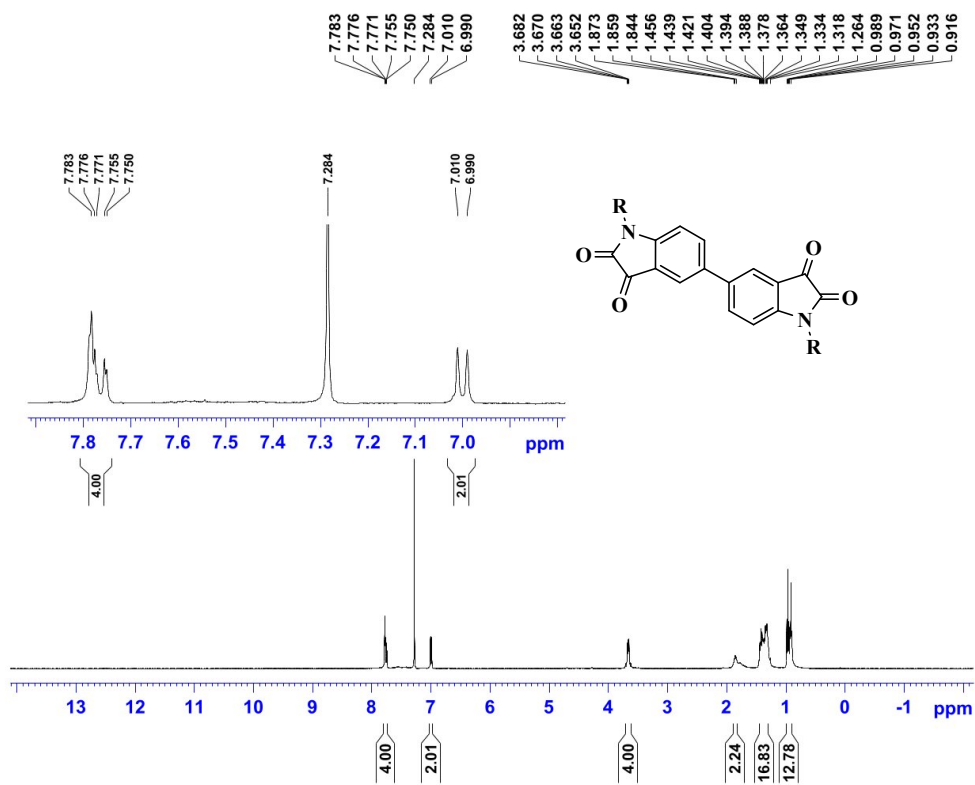

Figure S5: <sup>1</sup>H NMR spectra of compound 1

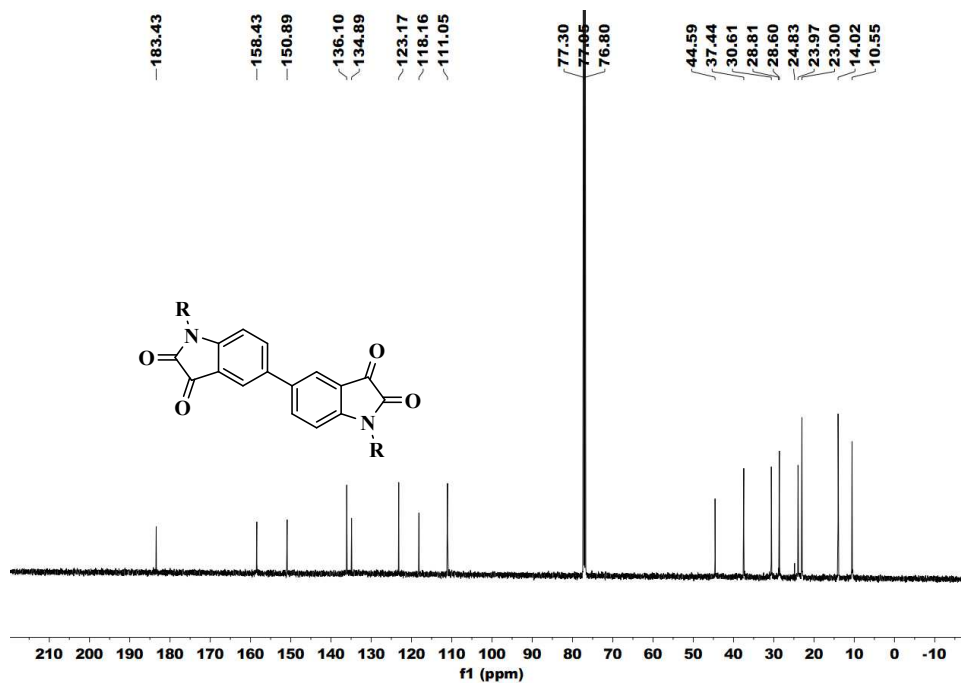

Figure S6: <sup>13</sup>C NMR spectra of compound 1

## Single Mass Analysis

Tolerance = 5.0 mDa / DBE: min = -1.5, max = 50.0

Element prediction: Off

Number of isotope peaks used for i-FIT = 3

Monoisotopic Mass, Even Electron Ions

19 formula(e) evaluated with 1 results within limits (up to 50 closest results for each mass)

Elements Used:

C: 0-32 H: 0-100 N: 0-2 O: 0-4

090223\_PPBI 22 (0.240)

Test Name :

1: TOF MS ES+

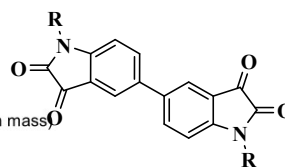

IITRPR

XEVO G2-XS QTOF  
090223\_PPBI

1.06e+007

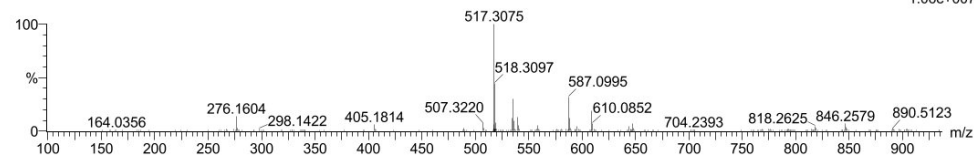

Minimum: -1.5  
Maximum: 5.0 10.0 50.0

| Mass     | Calc. Mass | mDa | PPM | DBE  | i-FIT | Norm | Conf(%) | Formula       |
|----------|------------|-----|-----|------|-------|------|---------|---------------|
| 517.3075 | 517.3066   | 0.9 | 1.7 | 13.5 | 799.0 | n/a  | n/a     | C32 H41 N2 O4 |

Figure S6: HR-MS data of compound 1

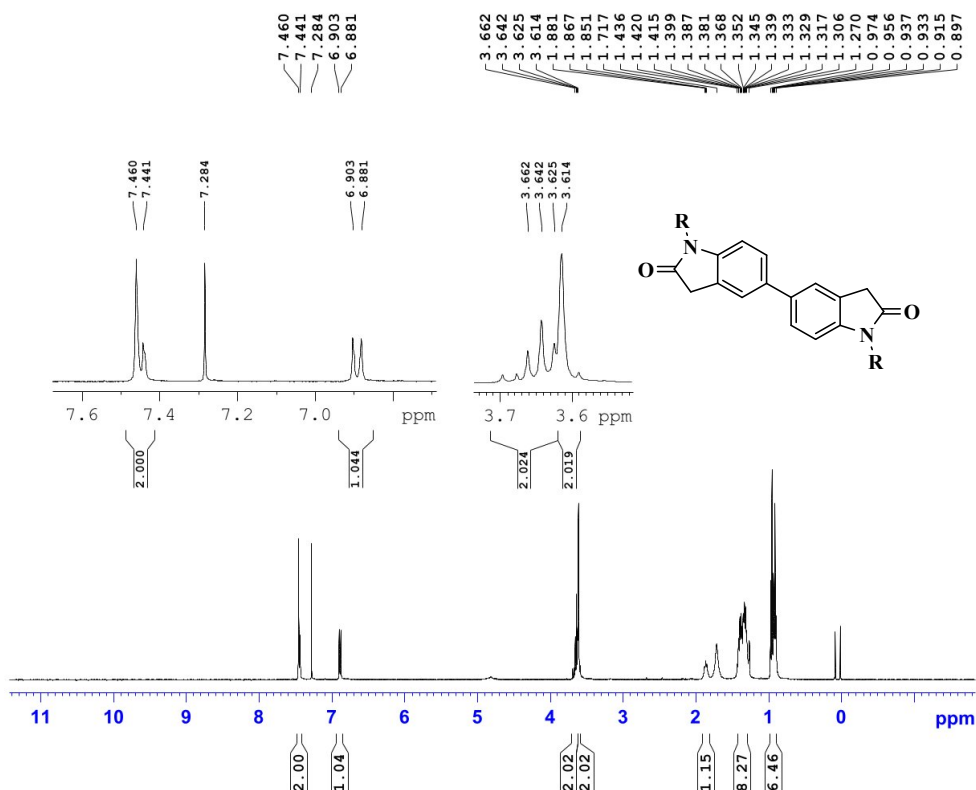Figure S7: <sup>1</sup>H NMR spectra of compound 2

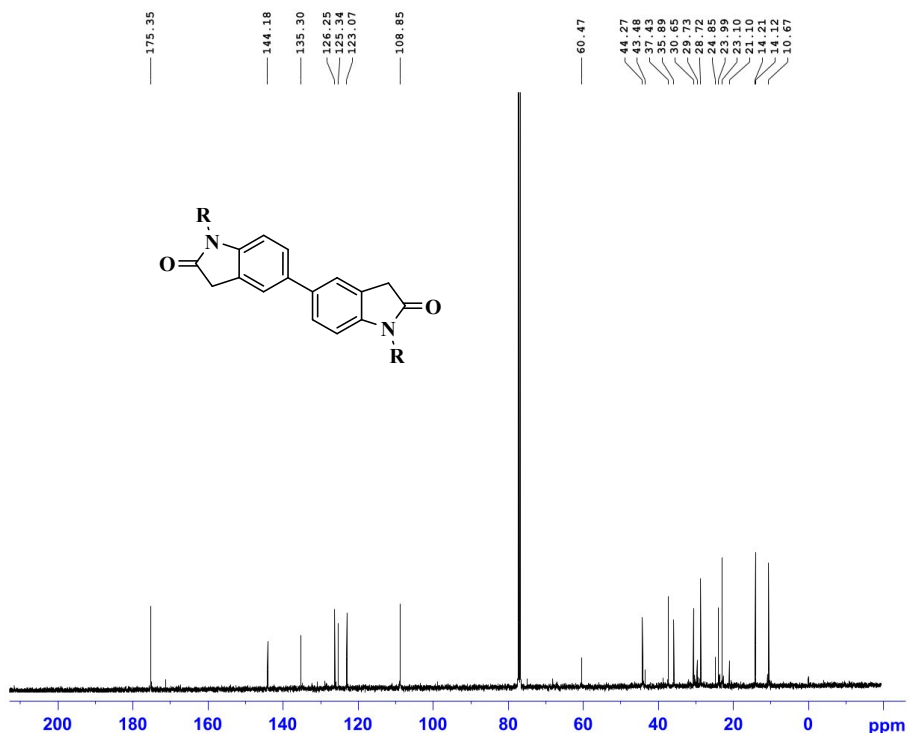

Figure S8: <sup>13</sup>C NMR spectra of compound 2

Elemental Composition Report

Page 1

Single Mass Analysis

Tolerance = 5.0 mDa / DBE: min = -1.5, max = 50.0  
 Element prediction: Off  
 Number of isotope peaks used for i-FIT = 3

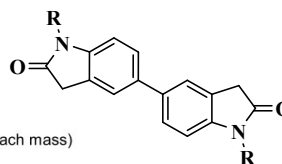

Monoisotopic Mass, Even Electron Ions  
 34 formula(e) evaluated with 1 results within limits (up to 50 closest results for each mass)  
 Elements Used:  
 C: 0-32 H: 0-100 N: 0-2 O: 0-4

090223\_PPRBI 72 (0.737)  
 Test Name :  
 1: TOF MS ES+

IITRPR

XEVO G2-XS QTOF  
 090223\_PPRBI

9.99e+006

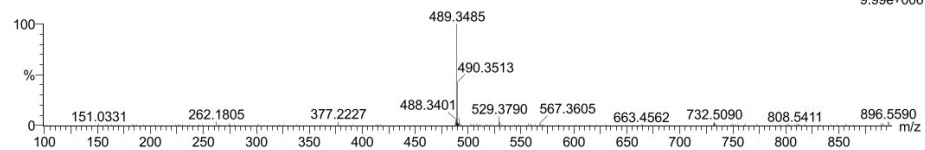

Minimum: -1.5  
 Maximum: 50.0

| Mass     | Calc. Mass | mDa | PPM | DBE  | i-FIT | Norm | Conf(%) | Formula       |
|----------|------------|-----|-----|------|-------|------|---------|---------------|
| 489.3485 | 489.3481   | 0.4 | 0.8 | 11.5 | 848.8 | n/a  | n/a     | C32 H45 N2 O2 |

Figure S9: HR-MS data of compound 2

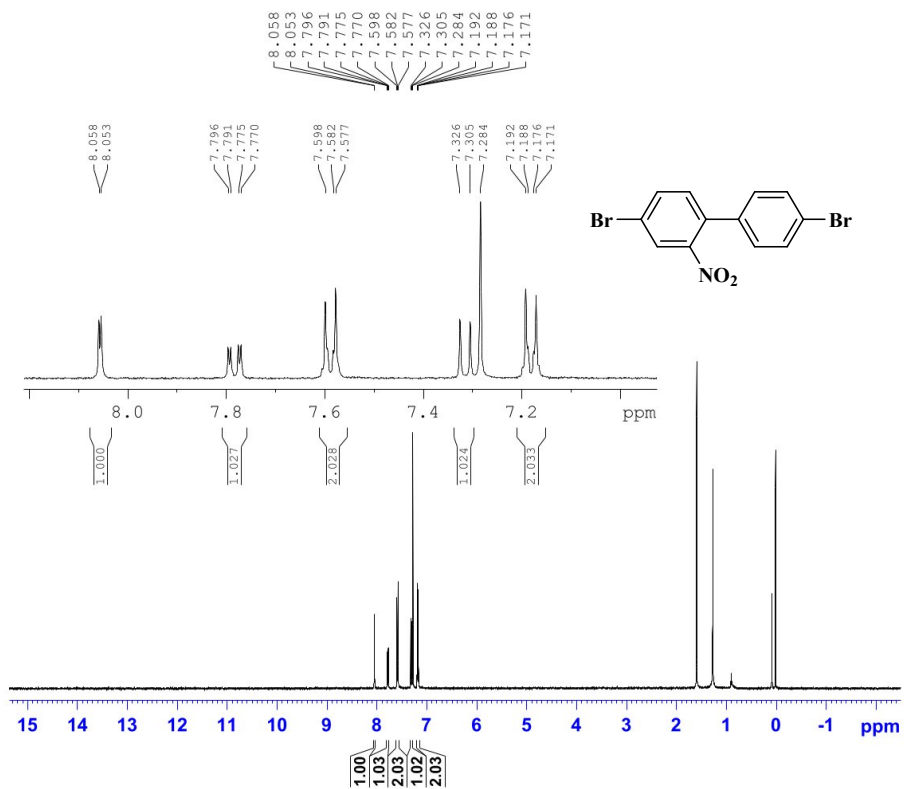

Figure S10:  $^1\text{H}$  NMR spectra of compound S3

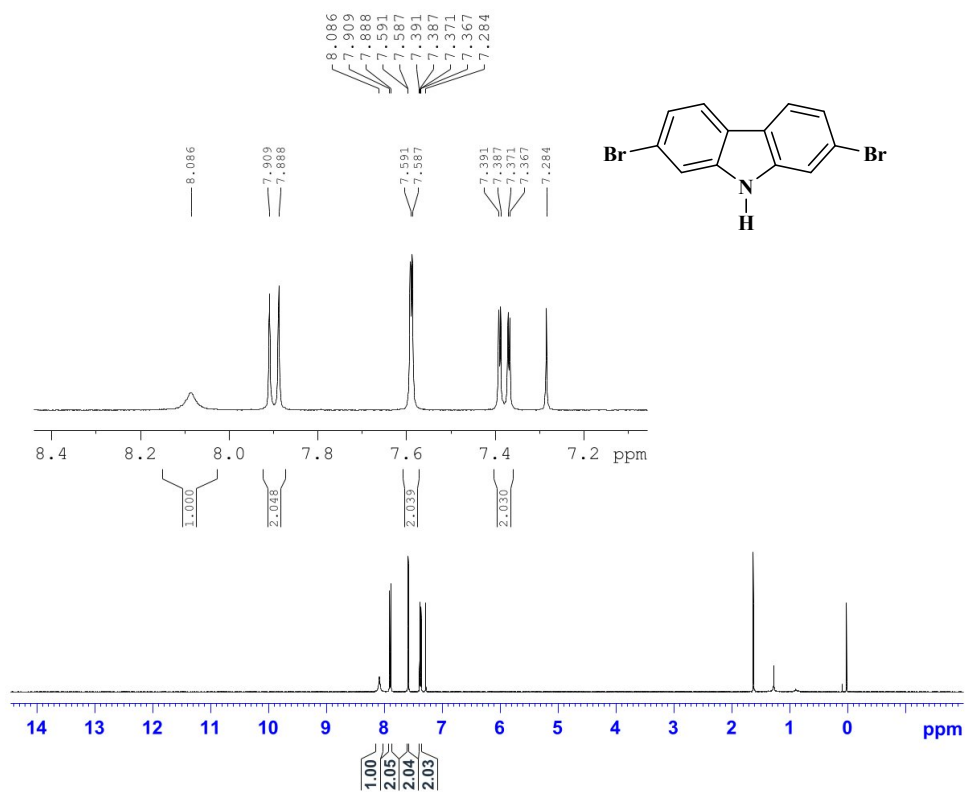

Figure S11:  $^1\text{H}$  NMR spectra of compound S4



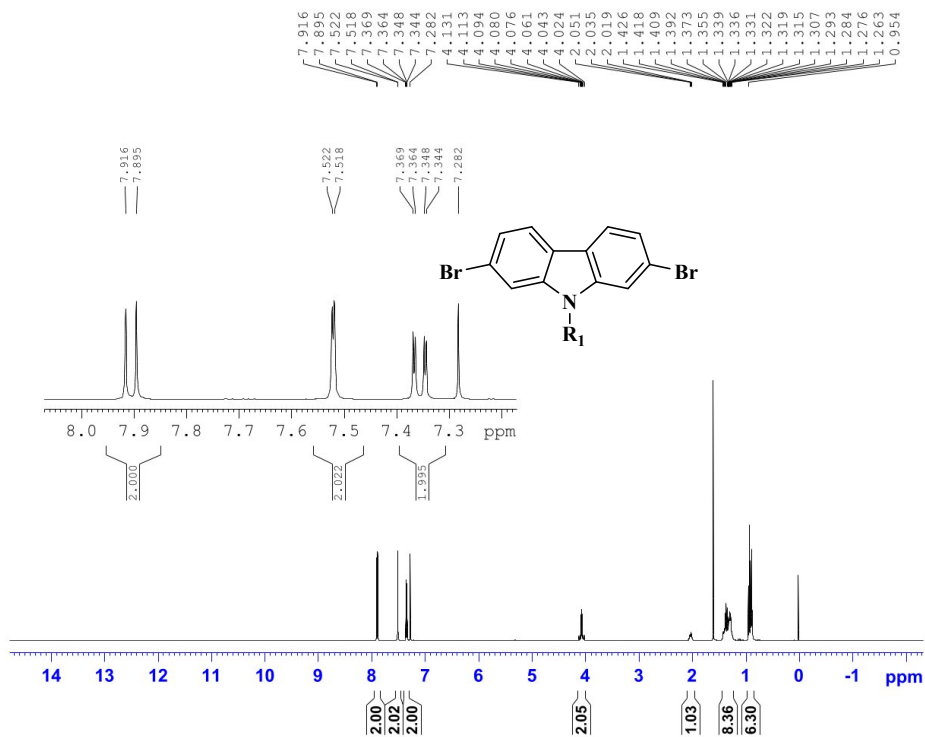

Figure S12:  $^1\text{H}$  NMR spectra of compound S5

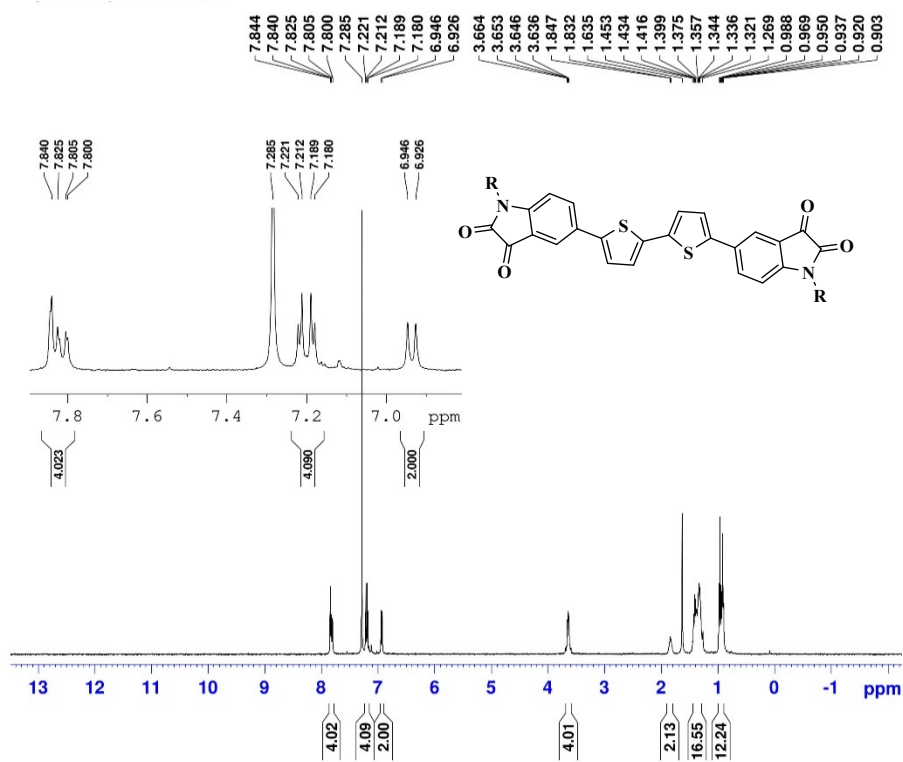

Figure S13:  $^1\text{H}$  NMR spectra of compound 3

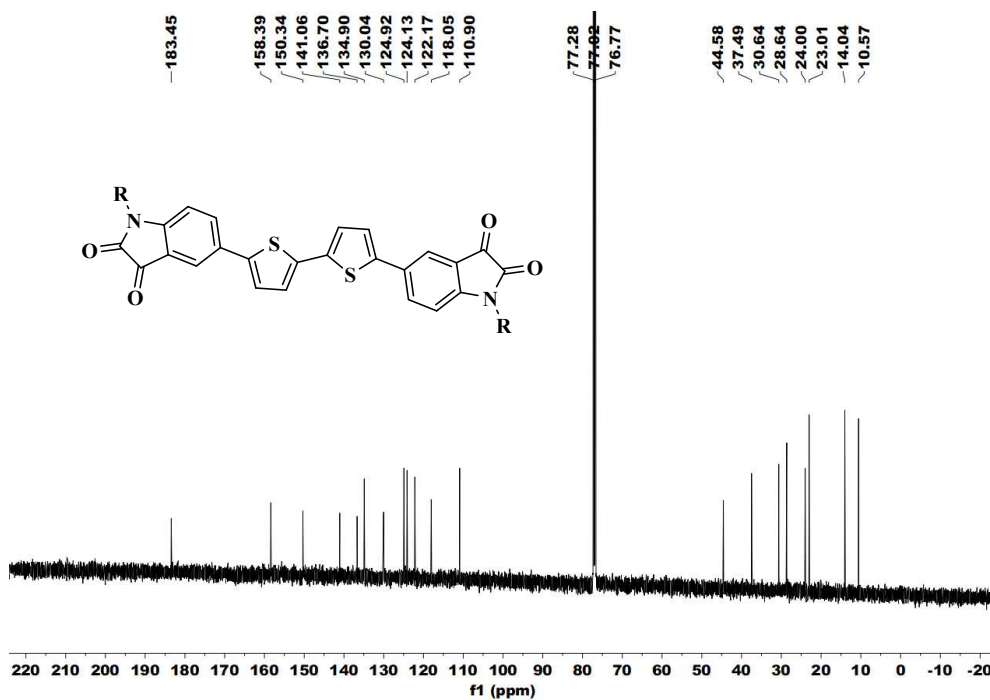

Figure S14: <sup>13</sup>C NMR spectra of compound 3

### Elemental Composition Report

Page 1

#### Single Mass Analysis

Tolerance = 5.0 mDa / DBE: min = -1.5, max = 50.0

Element prediction: Off

Number of isotope peaks used for i-FIT = 3

Monoisotopic Mass, Even Electron Ions

3 formula(e) evaluated with 1 results within limits (up to 50 closest results for each mass)

Elements Used:

C: 40-40 H: 1-100 N: 2-2 O: 2-4 S: 2-2

220823\_IBT 48 (0.497) Cm (47:54)

Test Name :

1: TOF MS ES+

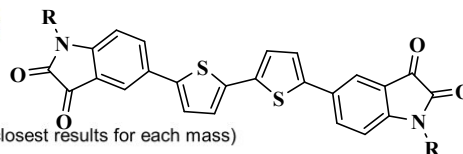

IITRPR

XEVO G2-XS QTOF  
220823\_IBT

1.09e+007

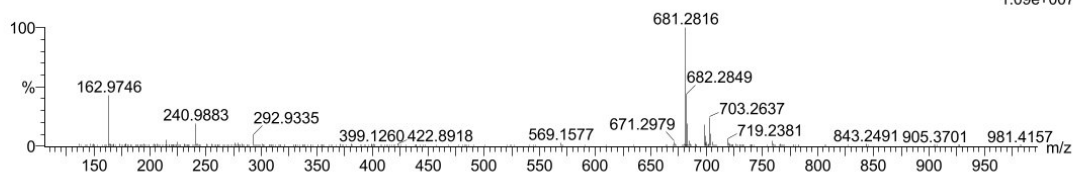

Minimum: -1.5  
Maximum: 5.0 20.0 50.0

| Mass     | Calc. Mass | mDa  | PPM  | DBE  | i-FIT | Norm | Conf (%) | Formula          |
|----------|------------|------|------|------|-------|------|----------|------------------|
| 681.2816 | 681.2821   | -0.5 | -0.7 | 19.5 | 785.1 | n/a  | n/a      | C40 H45 N2 O4 S2 |

Figure S15: HR-MS data of compound 3

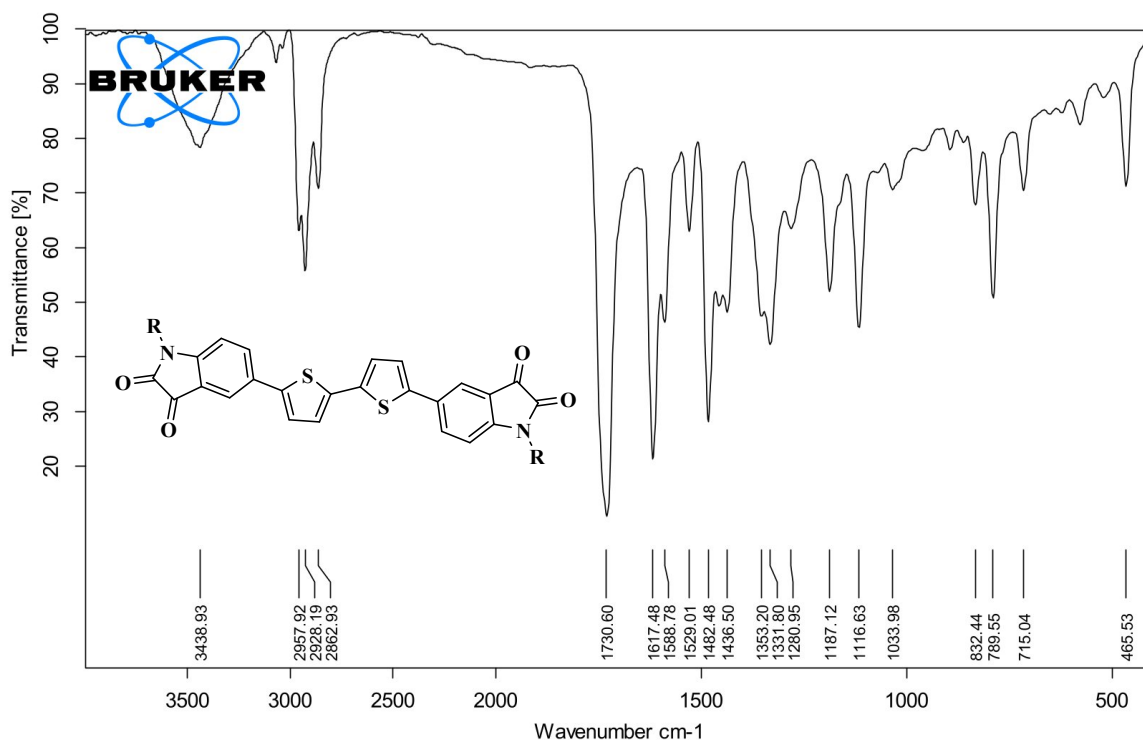

Figure S16: IR spectrum (KBr pellet) of compound 3

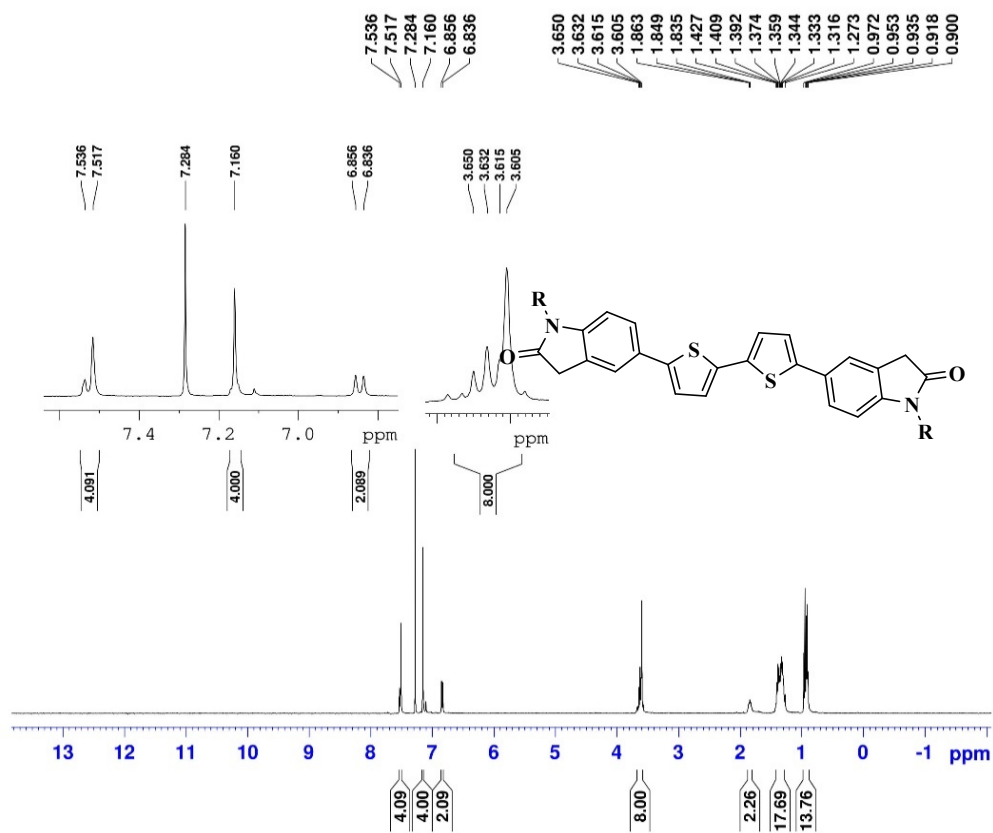

Figure S17: <sup>1</sup>H NMR spectra of compound 4

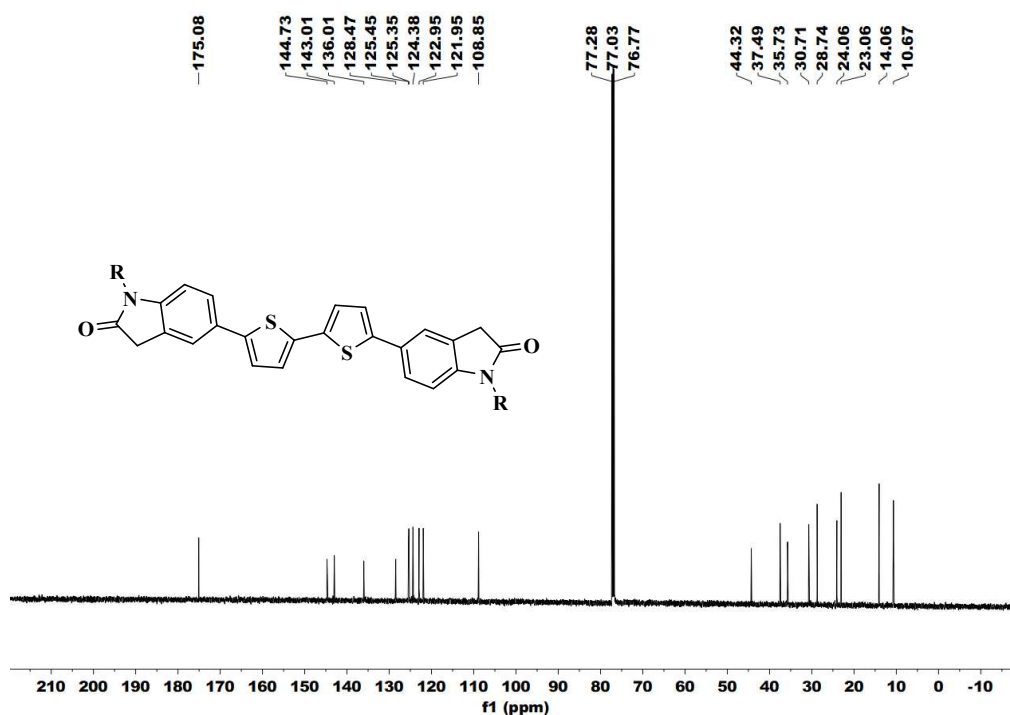

Figure S18: <sup>13</sup>C NMR spectra of compound 4

Elemental Composition Report

Page 1

Single Mass Analysis

Tolerance = 5.0 mDa / DBE: min = -1.5, max = 50.0  
 Element prediction: Off  
 Number of isotope peaks used for i-FIT = 3

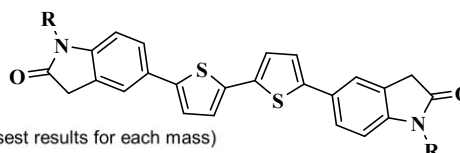

Monoisotopic Mass, Even Electron Ions

3 formula(e) evaluated with 1 results within limits (up to 50 closest results for each mass)

Elements Used:

C: 40-40 H: 1-100 N: 2-2 O: 2-4 S: 2-2

220823\_IBTRED 27 (0.294) Cm (27.41)

Test Name :

1: TOF MS ES+

IITRPR

XEVO G2-XS QTOF  
220823\_IBTRED

2.18e+007

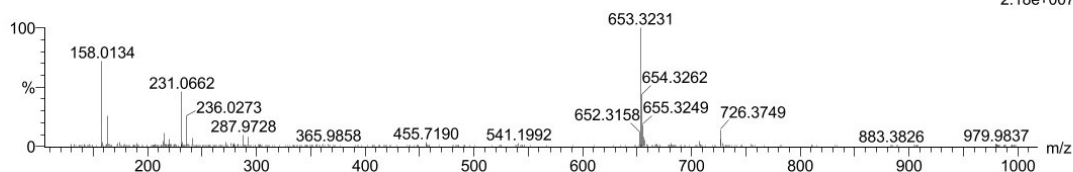

Minimum: -1.5  
 Maximum: 5.0 20.0 50.0

| Mass     | Calc. Mass | mDa  | PPM  | DBE  | i-FIT | Norm | Conf(%) | Formula          |
|----------|------------|------|------|------|-------|------|---------|------------------|
| 653.3231 | 653.3235   | -0.4 | -0.6 | 17.5 | 928.8 | n/a  | n/a     | C40 H49 N2 O2 S2 |

Figure S19: HR-MS data of compound 4

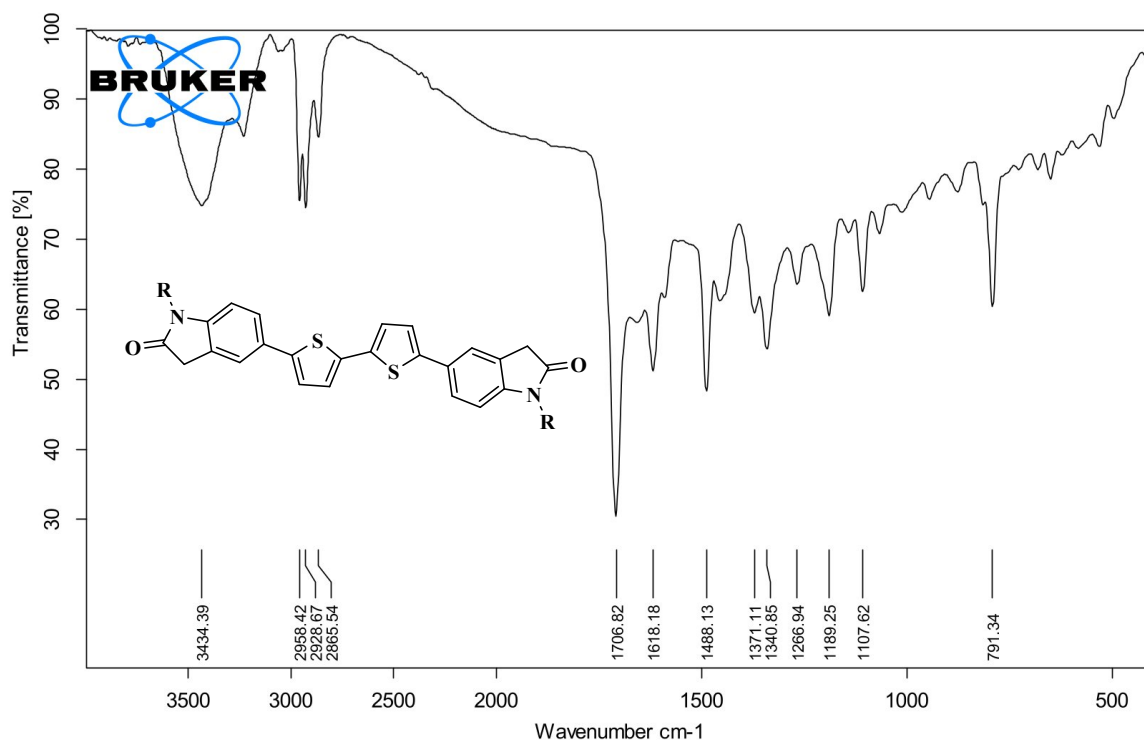

Figure S20: IR spectrum (KBr pellet) of compound 4

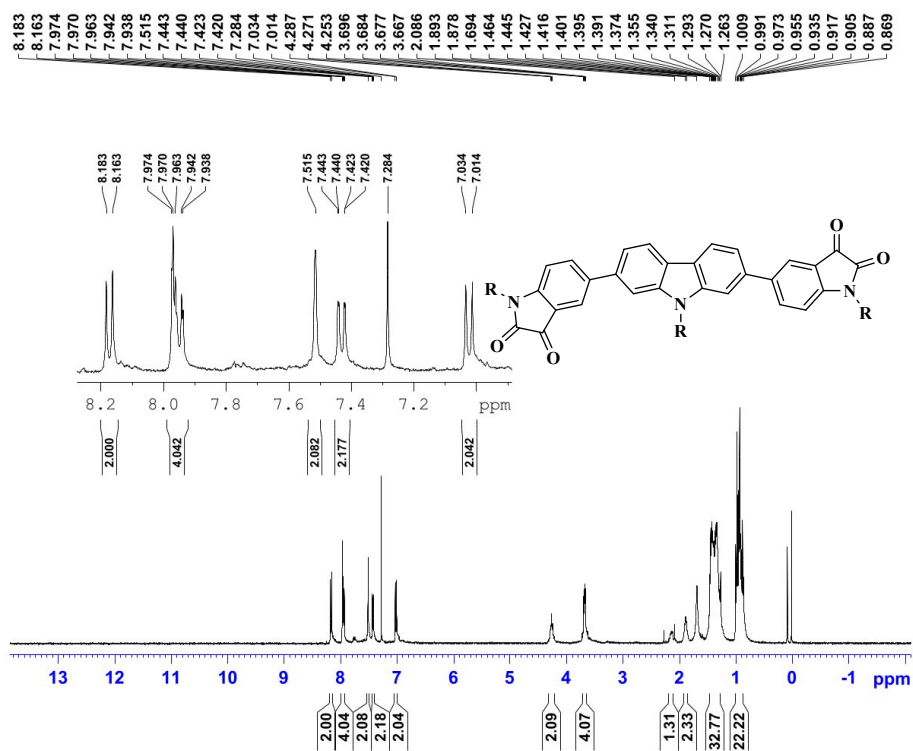

Figure S21: <sup>1</sup>H NMR spectra of compound 5

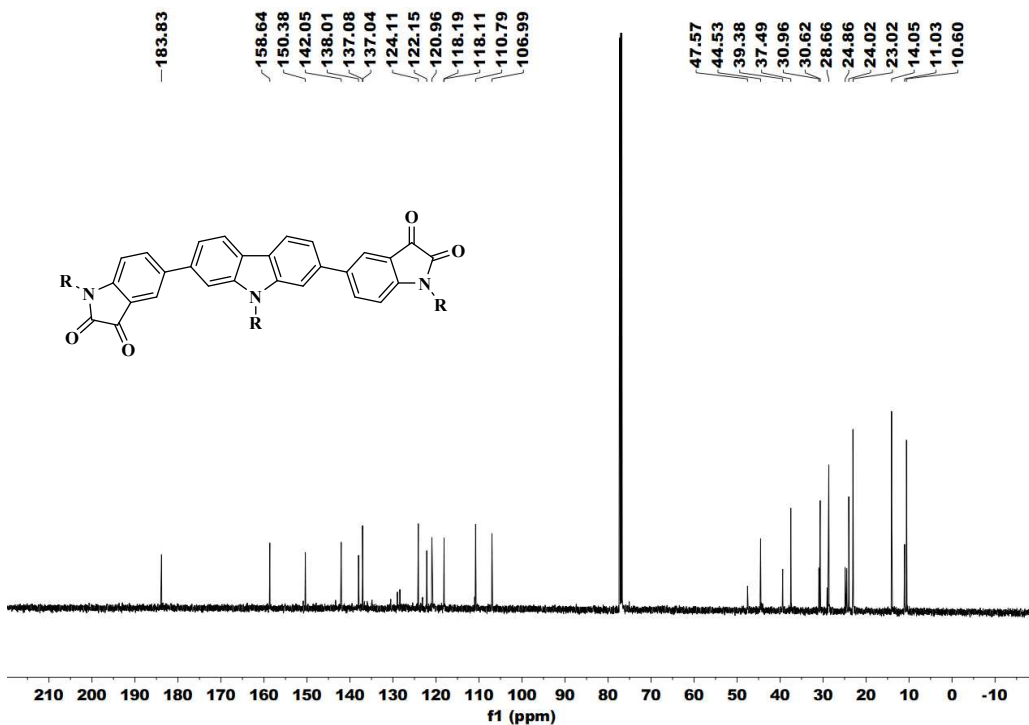

Figure S22: <sup>13</sup>C NMR spectra of compound 5

### Elemental Composition Report

Page 1

#### Single Mass Analysis

Tolerance = 5.0 mDa / DBE: min = -1.5, max = 50.0

Element prediction: Off

Number of isotope peaks used for i-FIT = 3

Monoisotopic Mass, Even Electron Ions

14 formula(e) evaluated with 1 results within limits (up to 50 closest results for each mass)

Elements Used:

C: 0-52 H: 0-80 N: 0-3 O: 0-4

090223\_PPCIS 31 (0.328)

Test Name :

1: TOF MS ES+

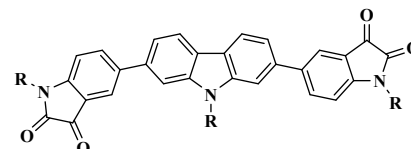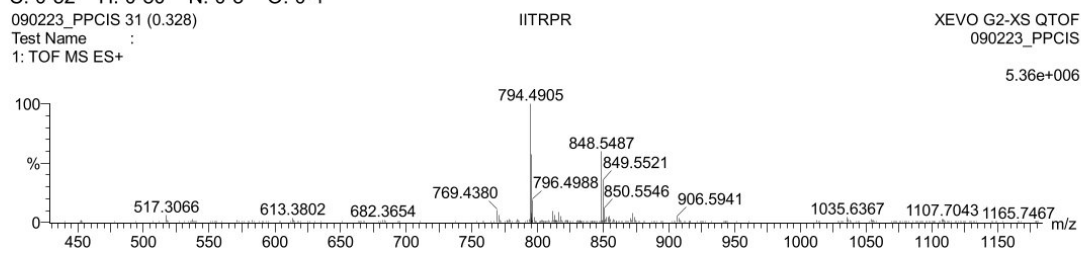

Minimum: -1.5  
Maximum: 5.0 10.0 50.0

| Mass     | Calc. Mass | mDa | PPM | DBE  | i-FIT | Norm | Conf (%) | Formula       |
|----------|------------|-----|-----|------|-------|------|----------|---------------|
| 794.4905 | 794.4897   | 0.8 | 1.0 | 22.5 | 592.7 | n/a  | n/a      | C52 H64 N3 O4 |

Figure S23: <sup>13</sup>C NMR spectra of compound 5

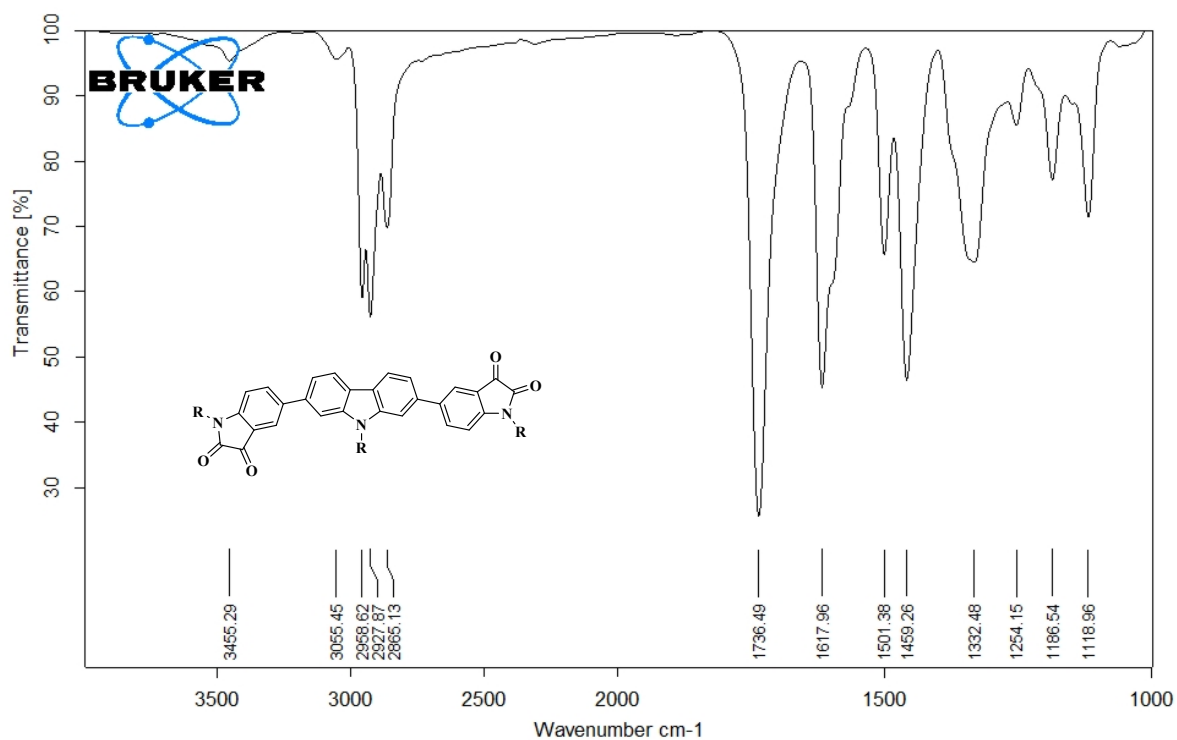

Figure S24: IR spectrum (KBr pellet) of compound **5**

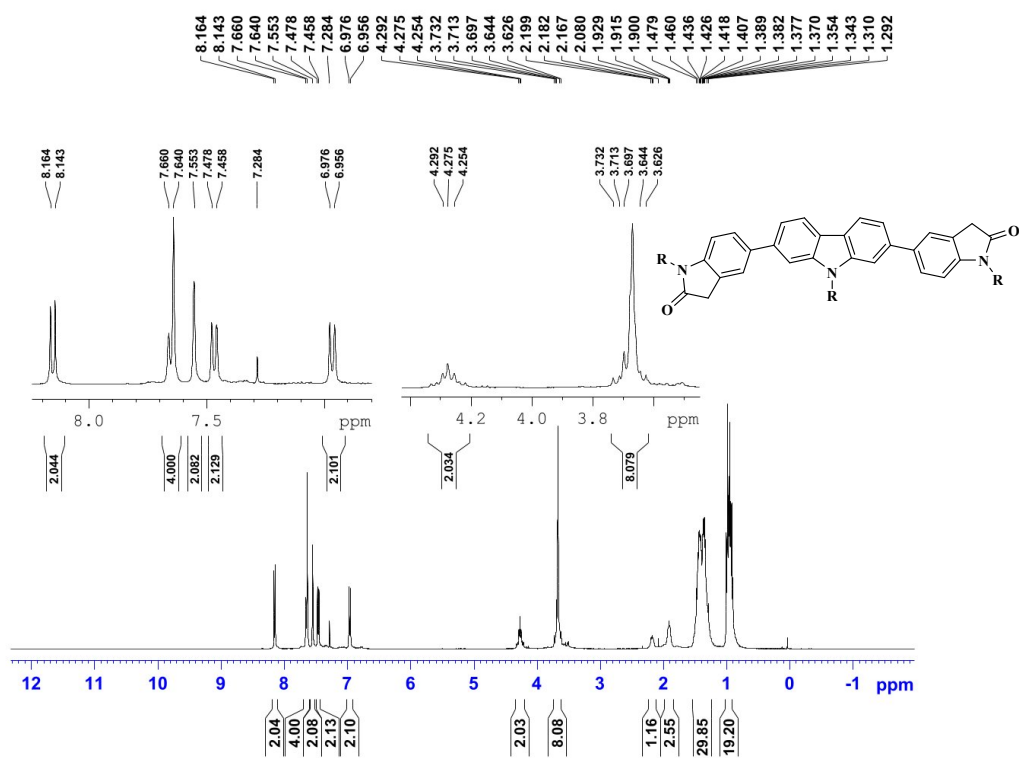

Figure S25: <sup>1</sup>H NMR spectra of compound **6**

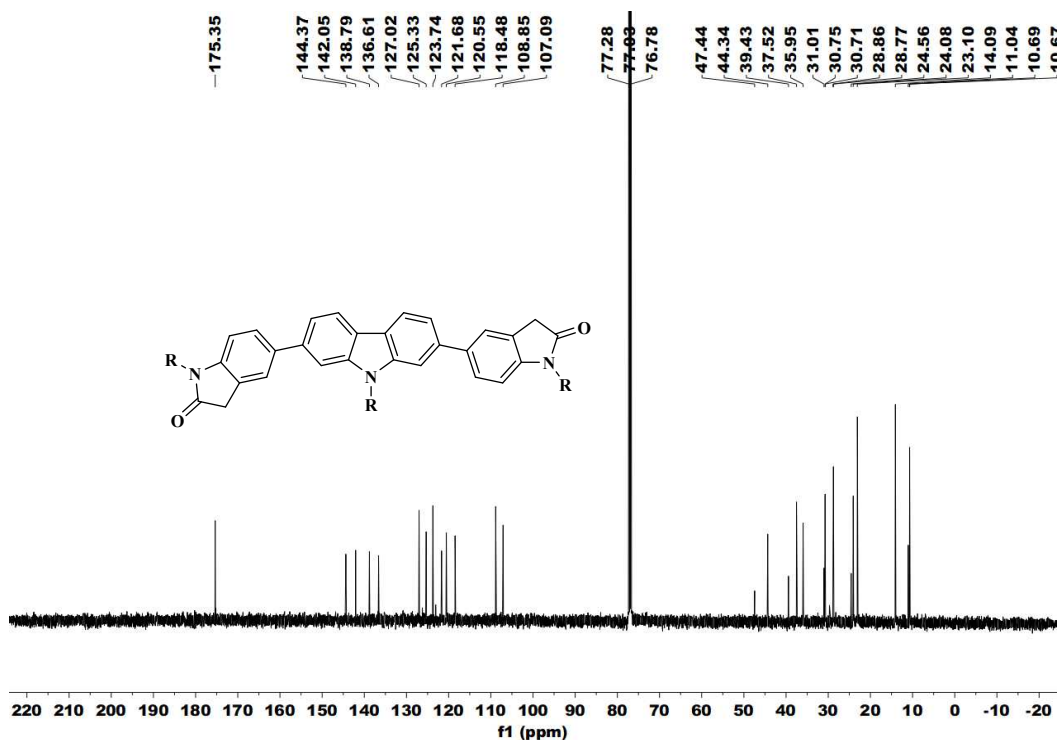

Figure S26:  $^{13}\text{C}$  NMR spectra of compound 6

Elemental Composition Report

Page 1

Single Mass Analysis

Tolerance = 5.0 mDa / DBE: min = -1.5, max = 50.0

Element prediction: Off

Number of isotope peaks used for i-FIT = 3

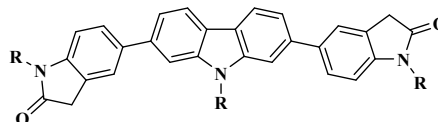

Monoisotopic Mass, Odd and Even Electron Ions

38 formula(e) evaluated with 1 results within limits (up to 50 closest results for each mass)

Elements Used:

C: 0-52 H: 0-100 N: 0-3 O: 0-4

090223\_PPICISRED 25 (0.277)

IITRPR

XEVO G2-XS QTOF

090223\_PPICISRED

Test Name :

2.68e+007

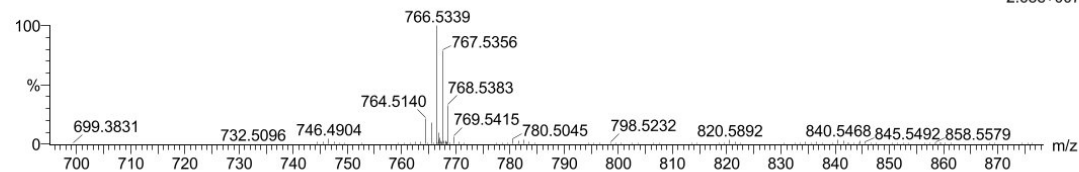

Minimum:

-1.5

Maximum:

5.0 10.0 50.0

Figure S27: HR-MS data of compound 6



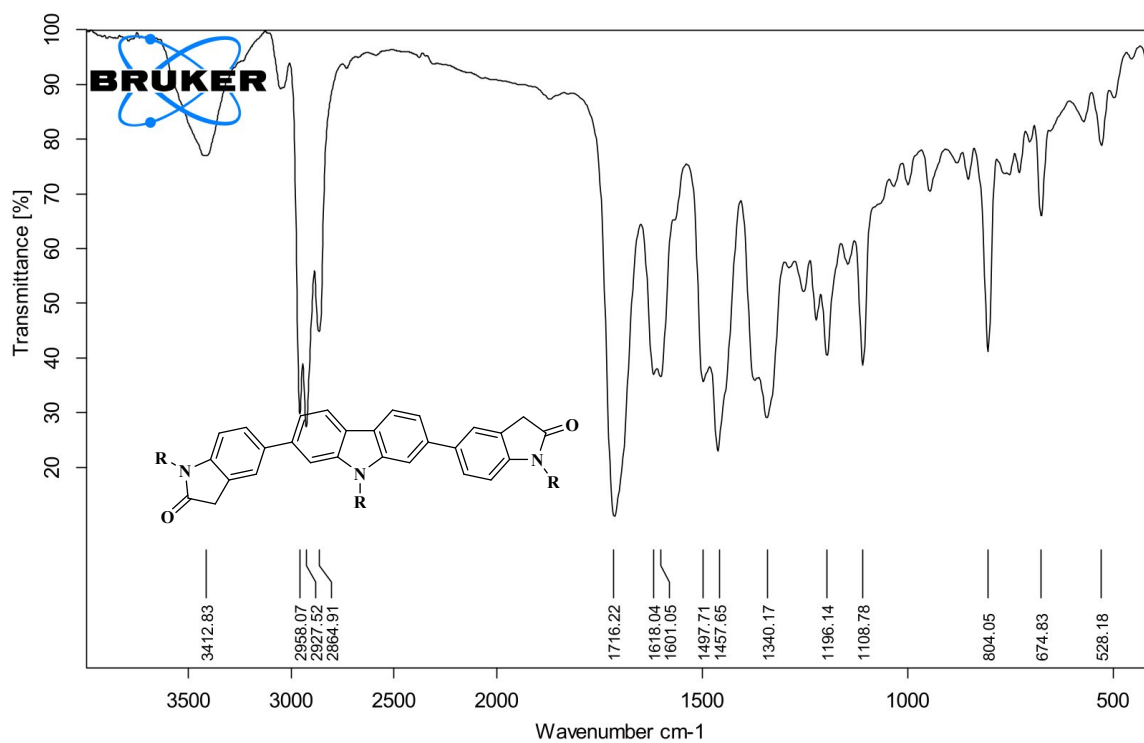

Figure S28: IR spectrum (KBr pellet) of compound 6

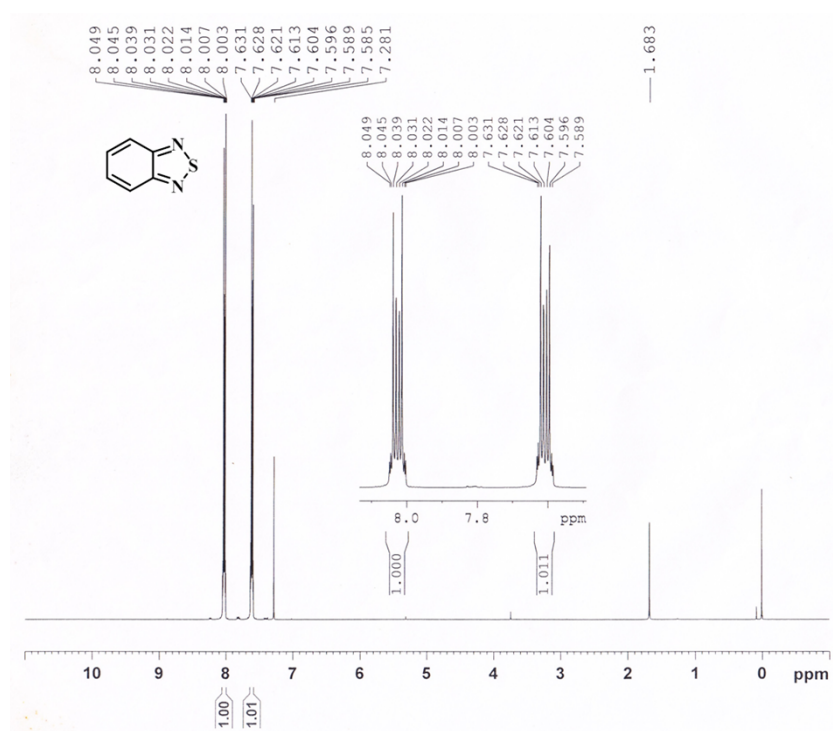

Figure S29: <sup>1</sup>H NMR spectra of compound S6

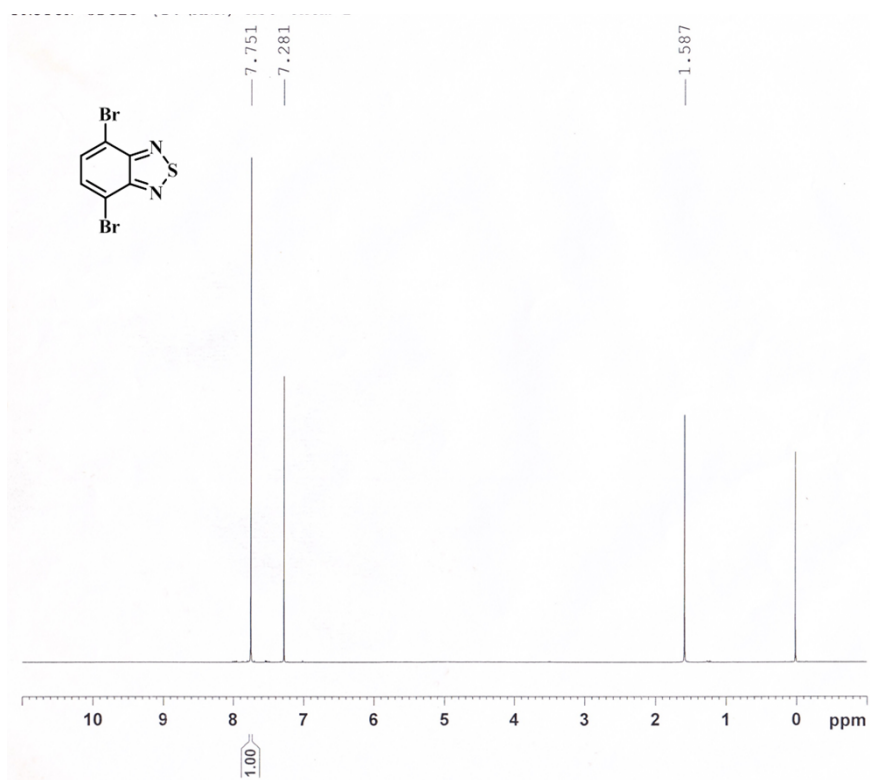

Figure S30: <sup>1</sup>H NMR spectra of compound S7

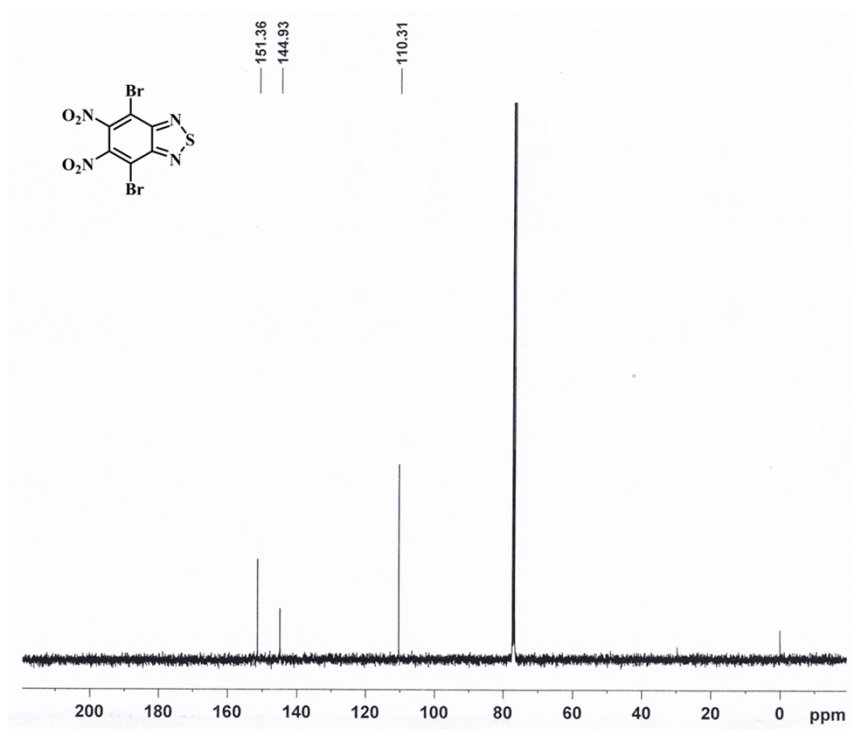

Figure S31: <sup>13</sup>C NMR spectra of compound S8

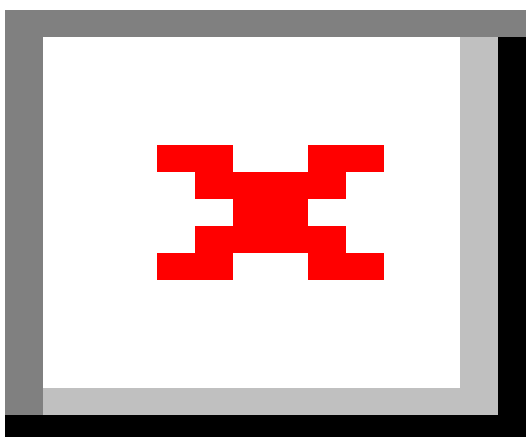

Figure S32:  $^1\text{H}$  NMR spectra of compound S9

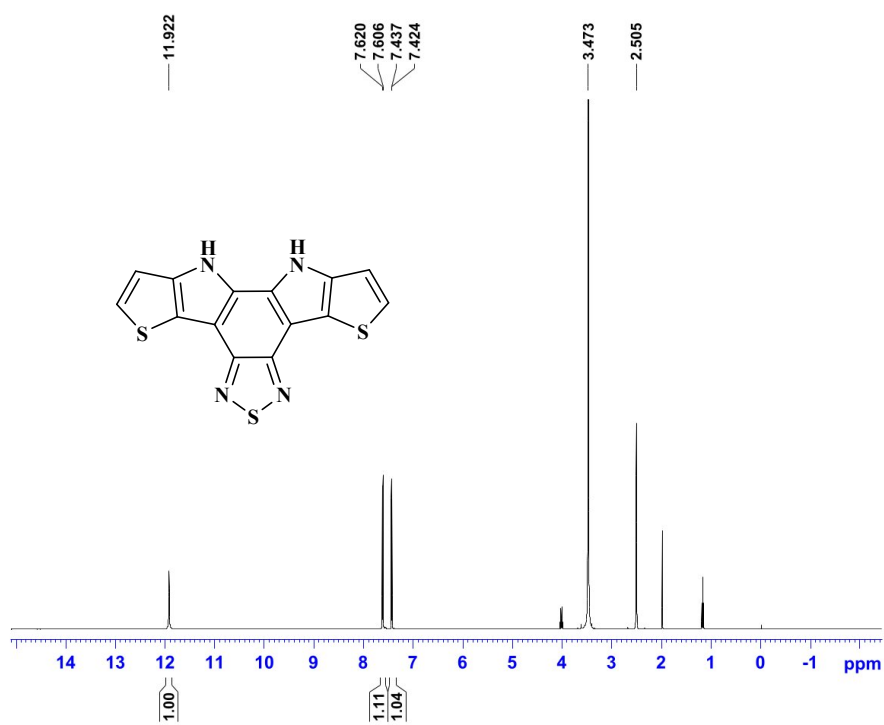

Figure S33:  $^1\text{H}$  NMR spectra of compound S10

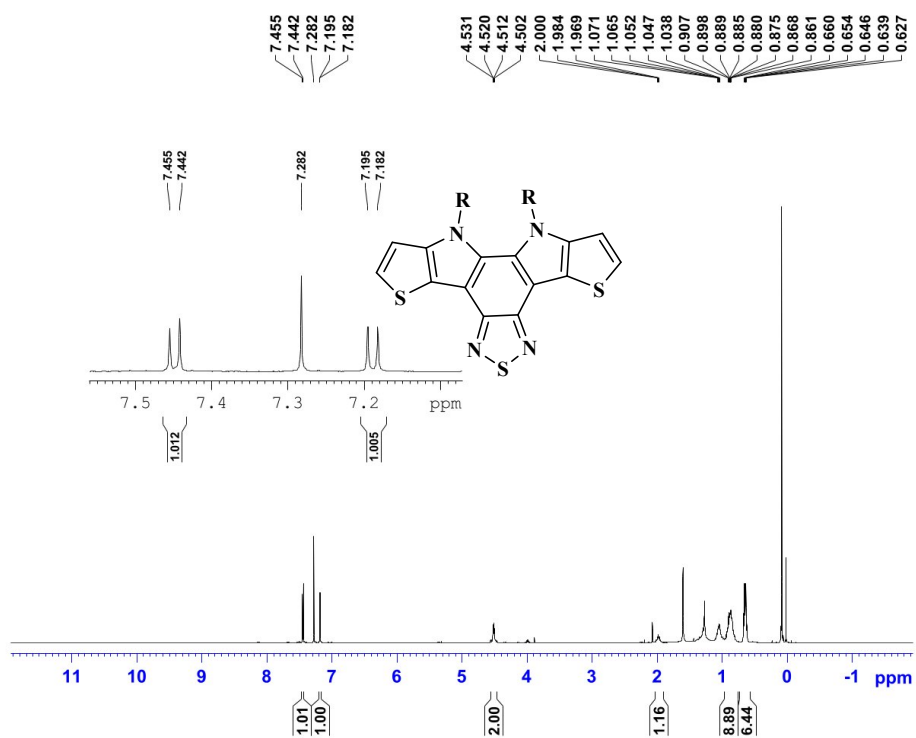

Figure S34: <sup>1</sup>H NMR spectra of compound S11

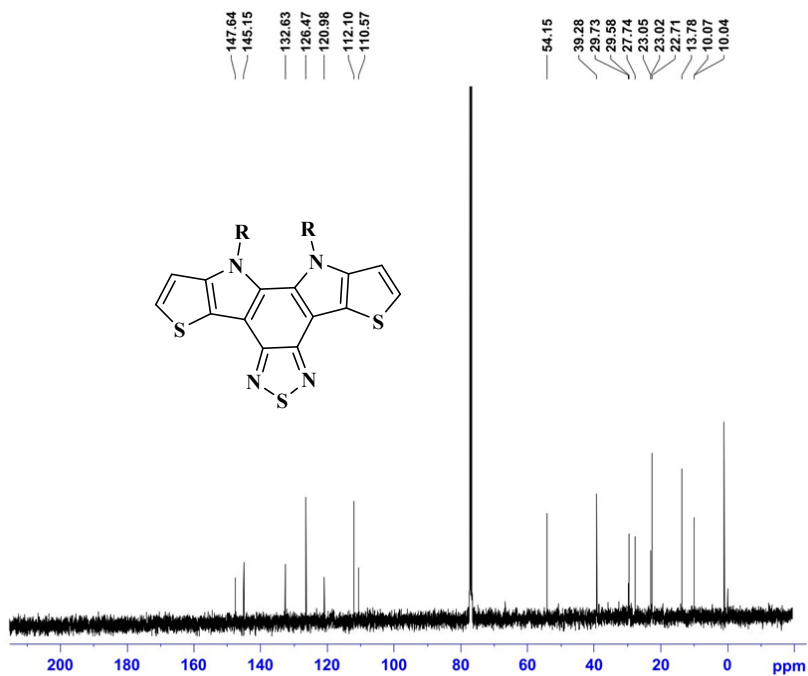

Figure S35: <sup>13</sup>C NMR spectra of compound S11

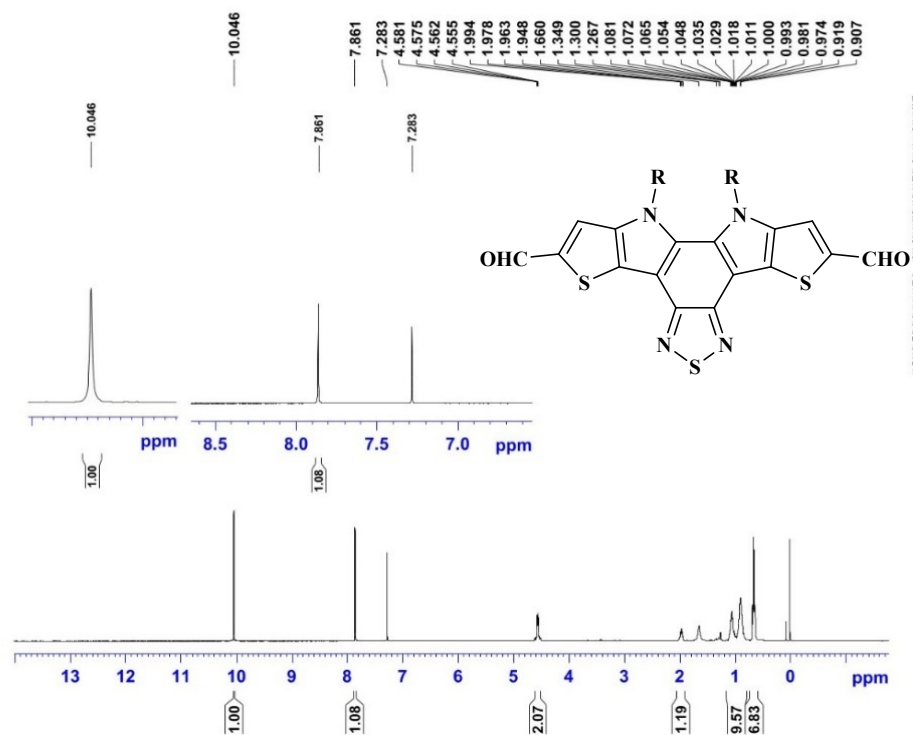

Figure S36: <sup>1</sup>H NMR spectra of compound 7

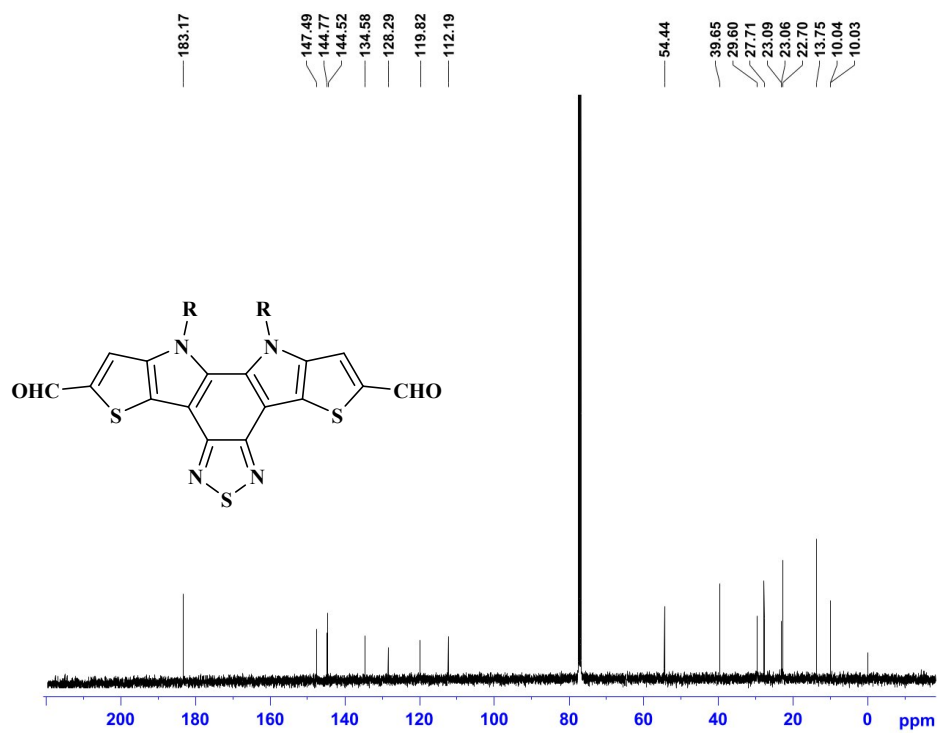

Figure S37: <sup>13</sup>C NMR spectra of compound 7

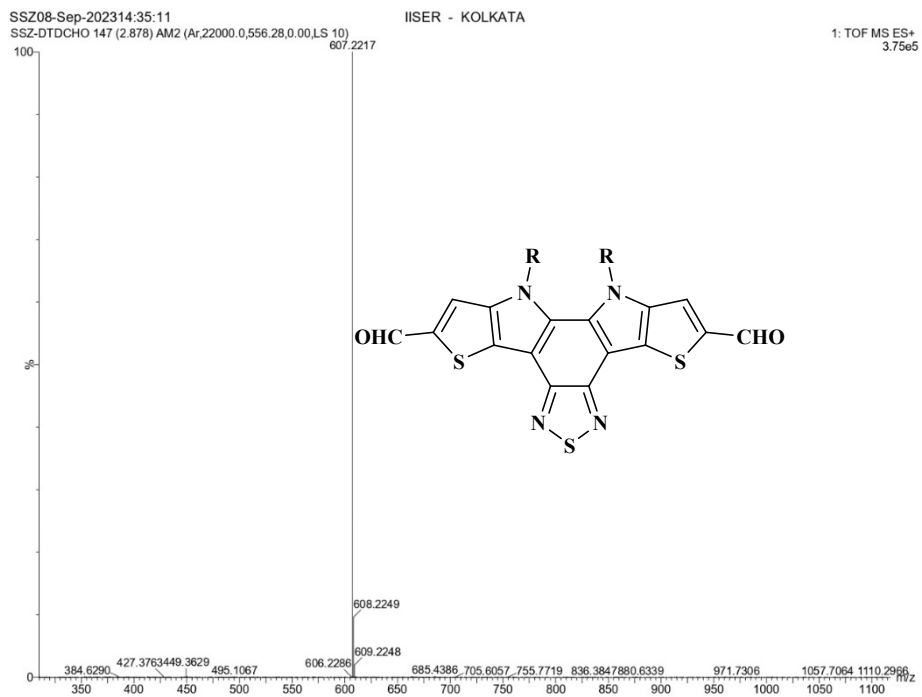

Figure S38: HR-MS data of compound 7

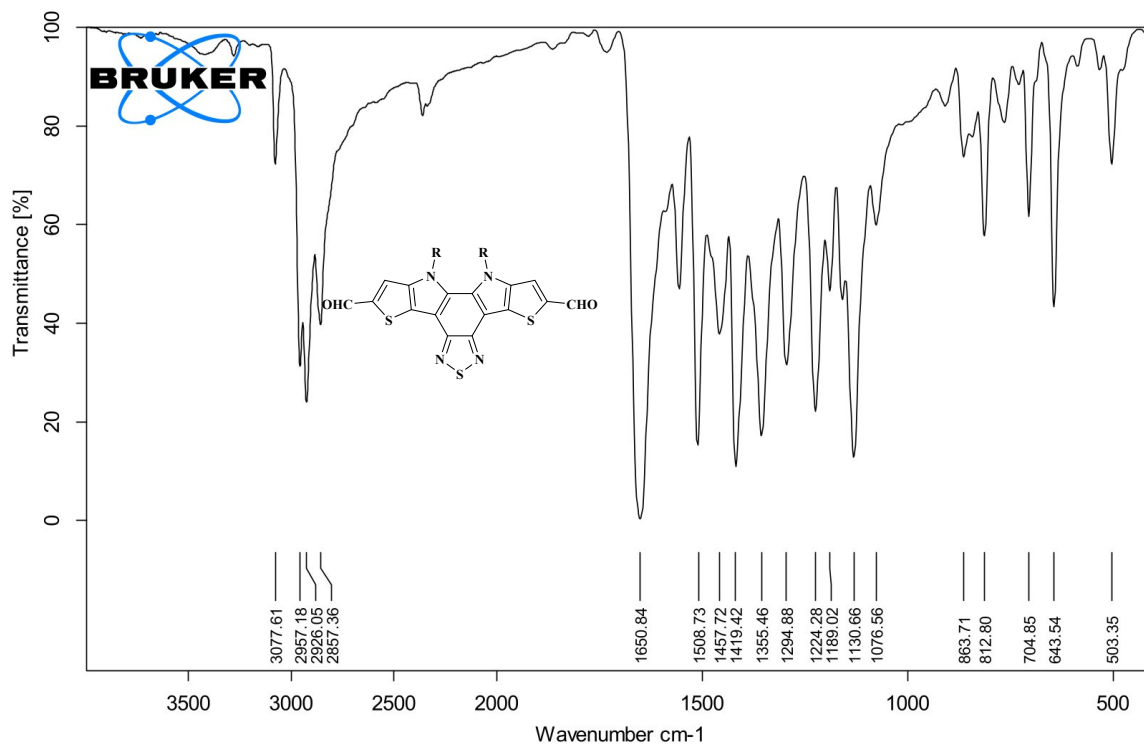

Figure S39: IR spectrum (KBr pellet) of compound 7

## Spectral data and GPC analysis data of polymers

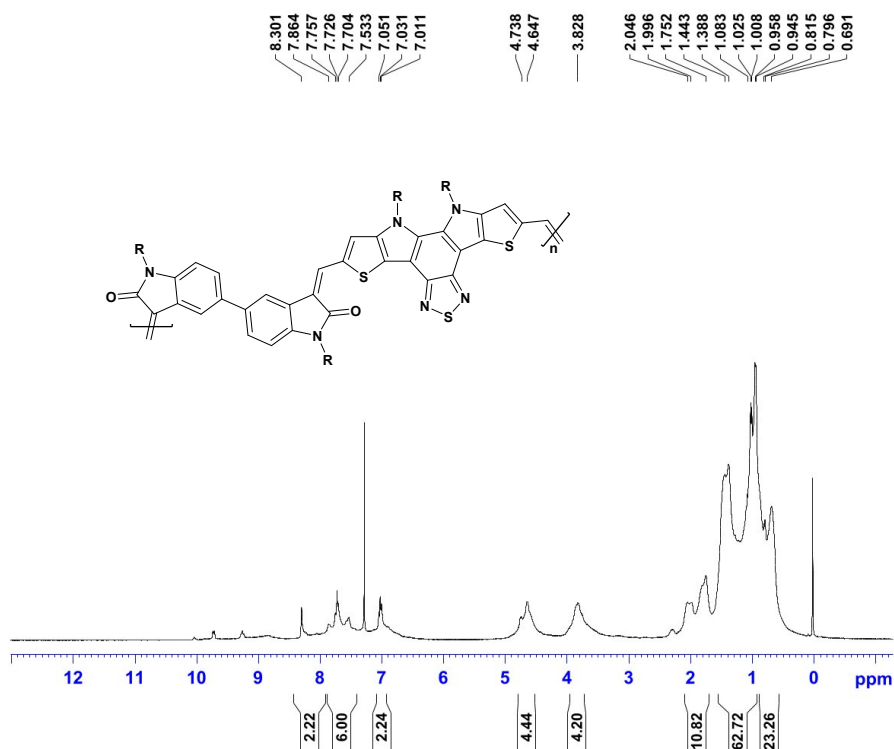

Figure S40: <sup>1</sup>H NMR spectra of polymer ADRI

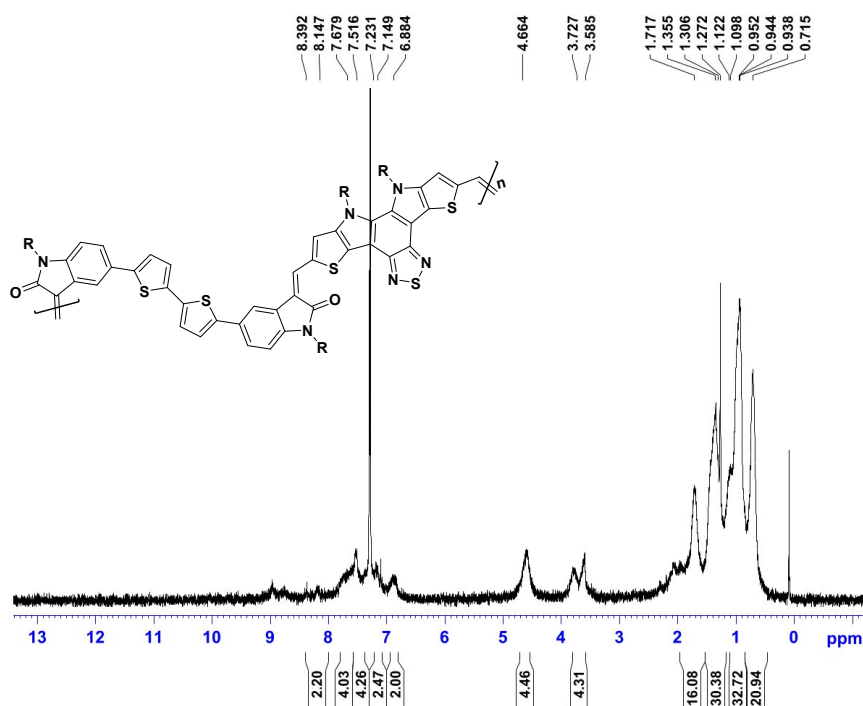

Figure S41: <sup>1</sup>H NMR spectra of polymer ADTRI

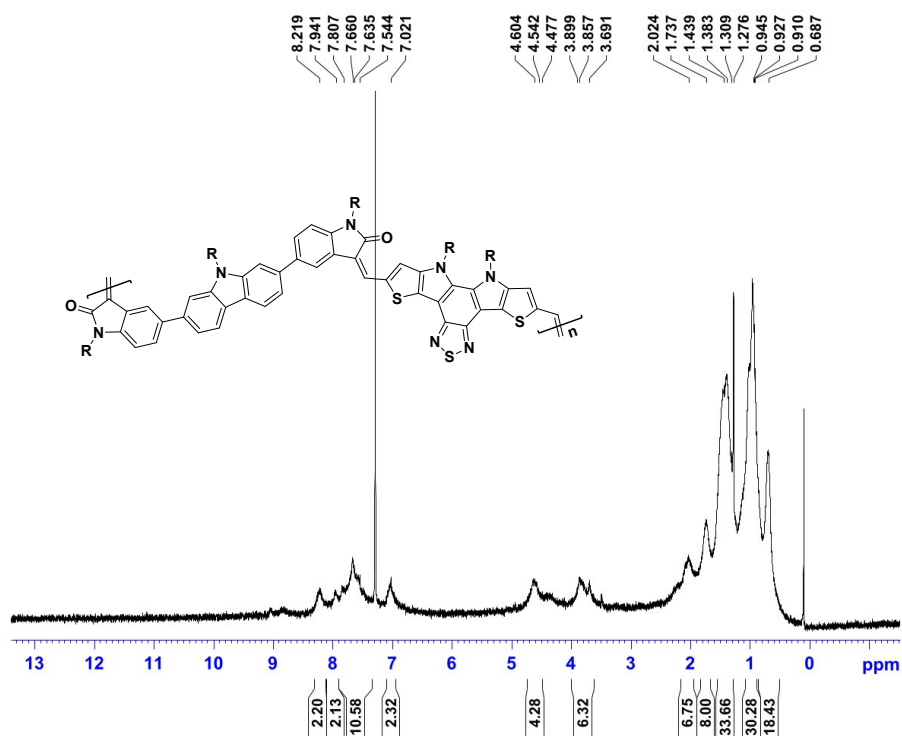

Figure S42:  $^1\text{H}$  NMR spectra of polymer ADCRI

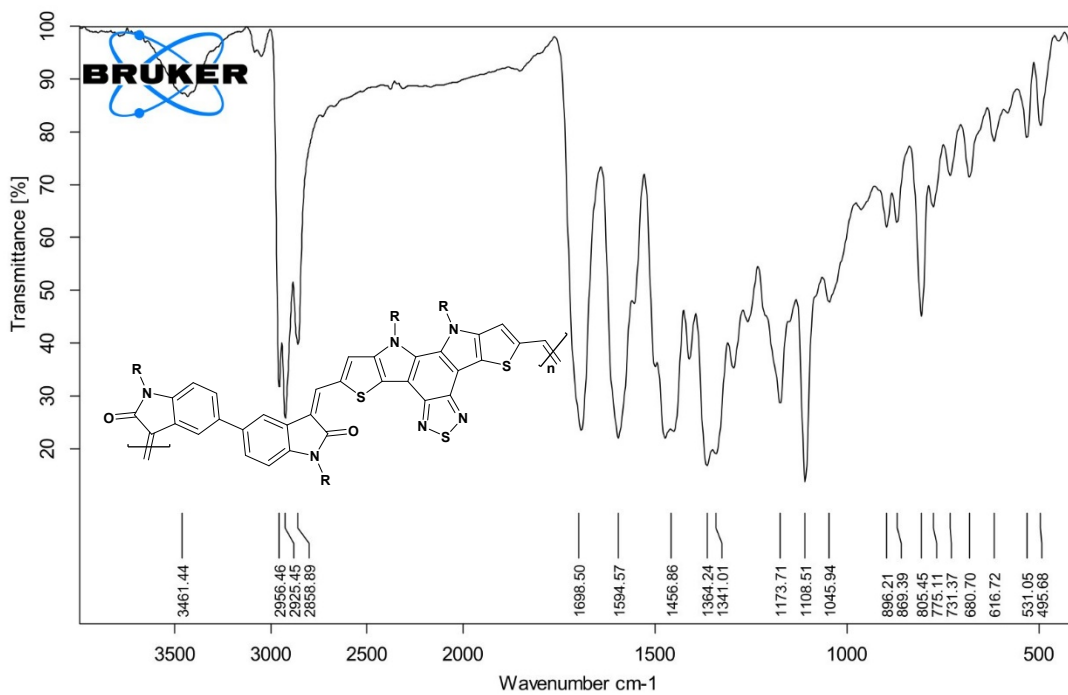

Figure 43: IR spectrum (KBr pellet) of polymer ADRI



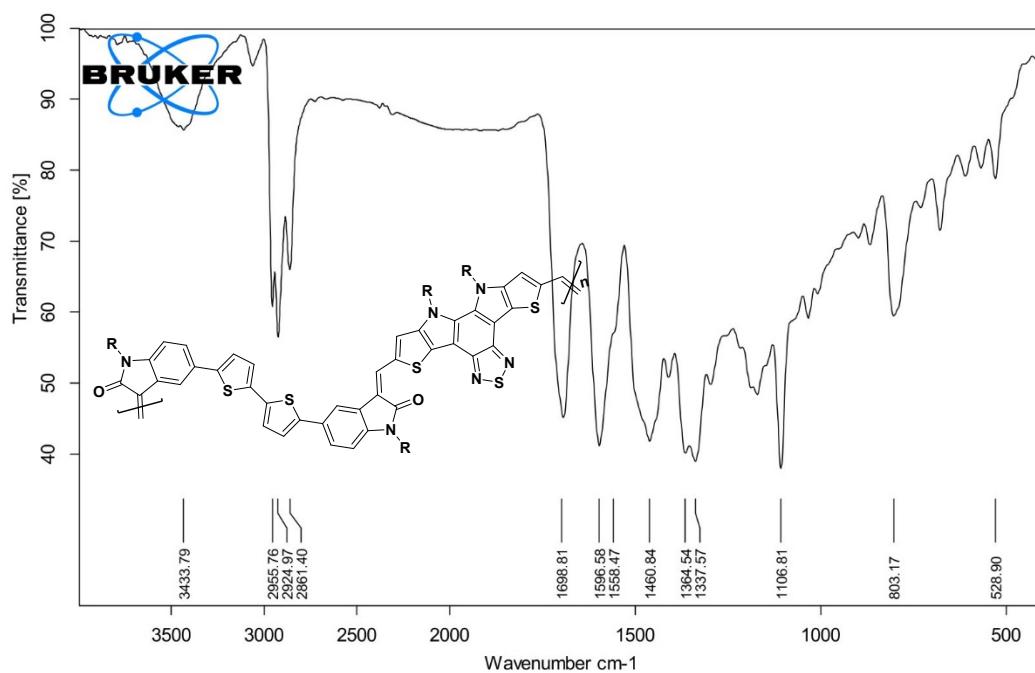

Figure 44: IR spectrum (KBr pellet) of polymer ADTRI

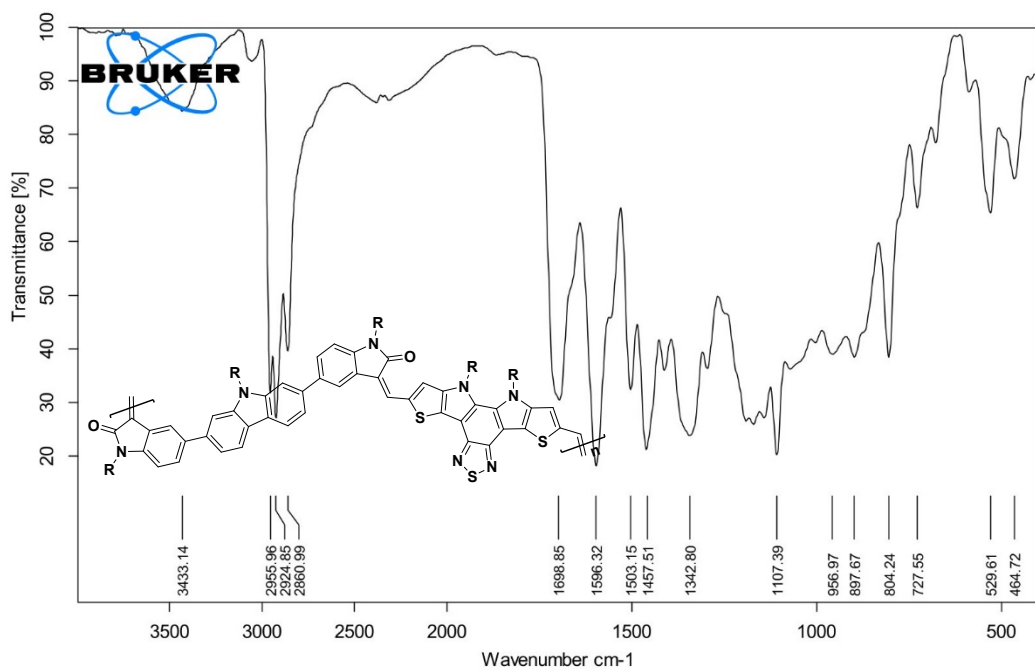

Figure 45: IR spectrum (KBr pellet) of polymer ADCRI

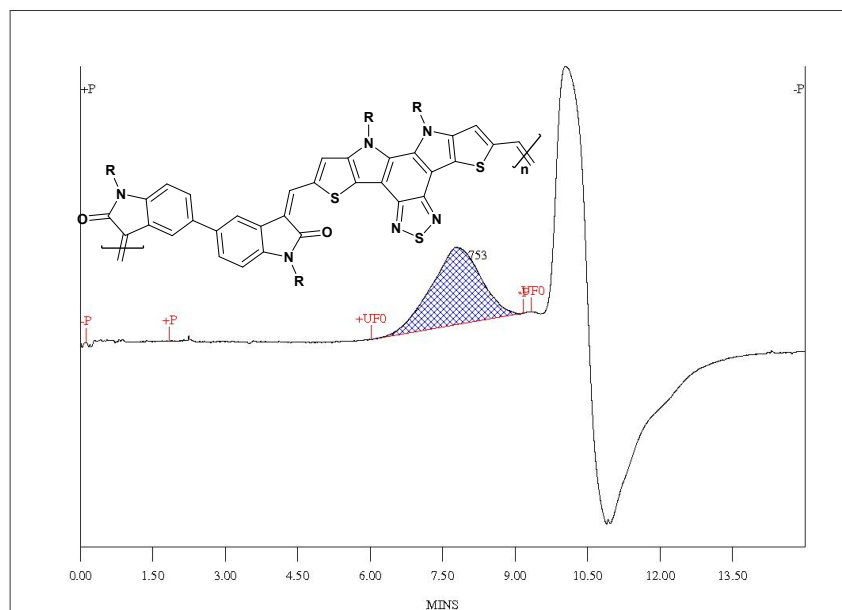

(n - 1) Average : 3025 Z Average (Mz) : 27633  
 Number Average (Mn) : 5694 (Z + 1) Average : 51309  
 Weight Average (Mw) : 12436 PolyDispersity (Mw/Mn) : 2.184  
 Total Area : 6.9942432e+004 (microvolt seconds)

*Peak Molecular Weight Report*

| Peak | Component | RT    | Area    | %Area   | PMwt   | Mw      | Mn     | Mw/Mn  | StartMw  | EndMw |
|------|-----------|-------|---------|---------|--------|---------|--------|--------|----------|-------|
| 1    |           | 7.753 | 69942.4 | 100.000 | 8009.8 | 12436.1 | 5693.9 | 2.1841 | 199190.0 | 479.0 |

**Figure S46: GPC Analysis report of polymer ADRI**

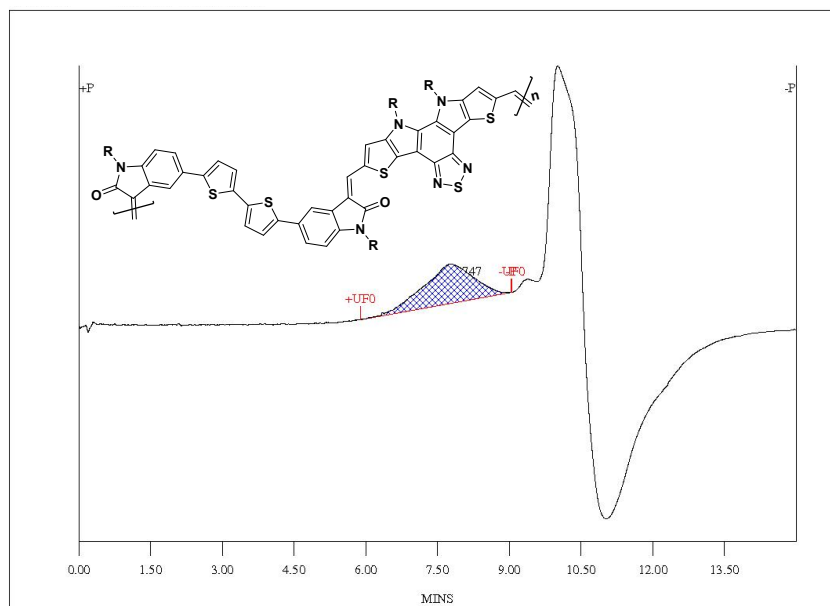

(n - 1) Average : 3372 Z Average (Mz) : 38337  
 Number Average (Mn) : 6296 (Z + 1) Average : 77683  
 Weight Average (Mw) : 15070 PolyDispersity (Mw/Mn) : 2.393  
 Total Area : 4.6117452e+004 (microvolt seconds)

*Peak Molecular Weight Report*

| Peak | Component | RT    | Area    | %Area   | PMwt   | Mw      | Mn     | Mw/Mn  | StartMw  | EndMw |
|------|-----------|-------|---------|---------|--------|---------|--------|--------|----------|-------|
| 1    |           | 7.747 | 46117.5 | 100.000 | 8107.0 | 15070.3 | 6296.4 | 2.3935 | 261596.1 | 794.2 |

**Figure S47: GPC Analysis report of polymer ADTRI**

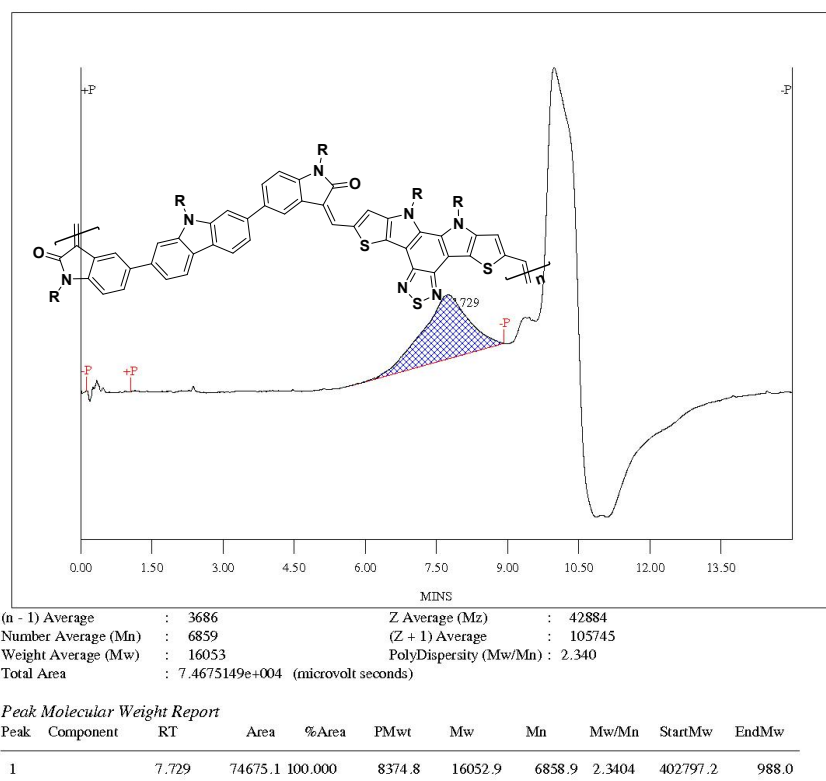

**Figure S48:** GPC Analysis report of polymer ADCRI

## References

- 1 P. R. Patel, Y. G. Kapdi, S. S. Soni, S. S. Zade and A. L. Patel, *New J. Chem.*, 2024, **48**, 7007-7019.
- 2 Y. W. Huang, Y. C. Lin, J. S. Li, W. C. Chen and C. C. Chueh, *J. Mater. Chem. C*, 2021, **9**, 9473–9483.
- 3 Y. Jiang, J. Chen, Y. Sun, Q. Li, Z. Cai, J. Li, Y. Guo, W. Hu and Y. Liu, *Adv. Mater.*, 2019, **31**, 1–7.
- 4 F. Dierschke, A. C. Grimsdale and K. Müllen, *Synthesis (Stuttg.)*, 2003, 2470–2472.
- 5 H. Wang, P. Cheng, Y. Liu, J. Chen, X. Zhan, W. Hu, Z. Shuai, Y. Li and D. Zhu, *J. Mater. Chem.*, 2012, **22**, 3432–3439.
- 6 H. Li, S. Sun, T. Salim, S. Bomma, A. C. Grimsdale and Y. M. Lam, *J. Polym. Sci. Part A Polym. Chem.*, 2012, **50**, 250–260.
- 7 Y. Yu, N. Xue, C. Xiao, M. K. Ravva, Y. Guo, L. Wu, L. Zhang, Z. Li, W. Yue and Z. Wang, *Fan, H.; Huang, D.; Yuan, D.; Di, C. Accept. Artic. Chem. C*, 2019, **7**, 12263–12269.
- 8 V. S. Kadam, P. A. Bhatt, H. K. Machhi, S. S. Soni, S. S. Zade and A. L. Patel, *Nano Select*, 2020, **1**, 491–498.
